# Supplementary material for: miR-22 and miR-205 Drive Tumor Aggressiveness of Mucoepidermoid Carcinomas of Salivary Glands
Source: Front Oncol. 2022 Feb 9;11:786150. doi: 10.3389/fonc.2021.786150 (PMC8864291; doi:10.3389/fonc.2021.786150)
Supplement: Supplementary Table S3 — Differentially expressed mRNAs in MEC compared to non-neoplastic salivary gland tissues (excel file). [file Table_3.xlsx]

## Sheet: sup tab 1
	Supplementary Table S3. Differentially expressed mRNAs in mucoepidermoid salivary gland carcinoma compared to non-neoplastic salivary gland tissues.
	Gene symbol	Approved name	P value	FDR	FC
	EGFL6	EGF-like-domain, multiple 6	< 1e-07	< 1e-07	66.6667
	FZD10	frizzled family receptor 10	< 1e-07	< 1e-07	66.6667
	KRT6A	keratin 6A	< 1e-07	< 1e-07	62.5
	COL3A1	collagen, type III, alpha 1	< 1e-07	< 1e-07	58.8235
	IL20RB	interleukin 20 receptor beta	< 1e-07	< 1e-07	50
	ADORA2B	adenosine A2b receptor	< 1e-07	< 1e-07	40
	P2RY2	purinergic receptor P2Y, G-protein coupled, 2	< 1e-07	< 1e-07	33.3333
	KRT6C	keratin 6C	< 1e-07	< 1e-07	33.3333
	COL12A1	collagen, type XII, alpha 1	< 1e-07	< 1e-07	32.2581
	COL1A1	collagen, type I, alpha 1	< 1e-07	< 1e-07	31.25
	ABCC3	ATP-binding cassette, sub-family C (CFTR/MRP), member 3	< 1e-07	< 1e-07	30.303
	DHCR24	24-dehydrocholesterol reductase	< 1e-07	< 1e-07	27.7778
	TYMS	thymidylate synthetase	< 1e-07	< 1e-07	24.3902
	NETO2	neuropilin (NRP) and tolloid (TLL)-like 2	< 1e-07	< 1e-07	24.3902
	HIST2H3A	histone cluster 2, H3a	< 1e-07	< 1e-07	23.8095
	TUBB3	tubulin, beta 3 class III	< 1e-07	< 1e-07	22.7273
	UBE2T	ubiquitin-conjugating enzyme E2T (putative)	< 1e-07	< 1e-07	22.7273
	GPR68	G protein-coupled receptor 68	< 1e-07	< 1e-07	22.7273
	POSTN	periostin, osteoblast specific factor	< 1e-07	< 1e-07	21.7391
	KIAA0101	KIAA0101	< 1e-07	< 1e-07	21.2766
	LOXL2	lysyl oxidase-like 2	< 1e-07	< 1e-07	20
	CTSL2	cathepsin L2	< 1e-07	< 1e-07	19.2308
	CD109	CD109 molecule	< 1e-07	< 1e-07	18.8679
	SLC45A3	solute carrier family 45, member 3	< 1e-07	< 1e-07	17.2414
	PCDHB14	protocadherin beta 14	< 1e-07	< 1e-07	17.2414
	S100A9	S100 calcium binding protein A9	< 1e-07	< 1e-07	16.9492
	ARID1A	AT rich interactive domain 1A (SWI-like)	< 1e-07	< 1e-07	16.6667
	SERPINE2	serpin peptidase inhibitor, clade E (nexin, plasminogen activator inhibitor type 1), member 2	< 1e-07	< 1e-07	15.873
	SLC16A3	solute carrier family 16, member 3 (monocarboxylic acid transporter 4)	< 1e-07	< 1e-07	15.625
	ADCY7	adenylate cyclase 7	< 1e-07	< 1e-07	15.625
	PHLDA2	pleckstrin homology-like domain, family A, member 2	< 1e-07	< 1e-07	15.625
	RUNX3	runt-related transcription factor 3	< 1e-07	< 1e-07	14.4928
	COL1A2	collagen, type I, alpha 2	< 1e-07	< 1e-07	14.0845
	SH3PXD2A	SH3 and PX domains 2A	< 1e-07	< 1e-07	13.8889
	FN1	fibronectin 1	< 1e-07	< 1e-07	13.6986
	ADAMTS14	ADAM metallopeptidase with thrombospondin type 1 motif, 14	< 1e-07	< 1e-07	13.3333
	TSHZ3	teashirt zinc finger homeobox 3	< 1e-07	< 1e-07	12.8205
	NLN	neurolysin (metallopeptidase M3 family)	< 1e-07	< 1e-07	12.5
	FNDC1	fibronectin type III domain containing 1	< 1e-07	< 1e-07	12.5
	TIAM1	T-cell lymphoma invasion and metastasis 1	< 1e-07	< 1e-07	12.3457
	CORO2A	coronin, actin binding protein, 2A	< 1e-07	< 1e-07	12.3457
	ECM1	extracellular matrix protein 1	< 1e-07	< 1e-07	12.1951
	SH3PXD2B	SH3 and PX domains 2B	< 1e-07	< 1e-07	12.0482
	GALNTL4	UDP-N-acetyl-alpha-D-galactosamine:polypeptide N-acetylgalactosaminyltransferase-like 4	< 1e-07	< 1e-07	12.0482
	PXDN	peroxidasin homolog (Drosophila)	< 1e-07	< 1e-07	11.9048
	CCNB2	cyclin B2	< 1e-07	< 1e-07	11.6279
	CAMSAP1	calmodulin regulated spectrin-associated protein 1	< 1e-07	< 1e-07	11.4943
	CLIC3	chloride intracellular channel 3	< 1e-07	< 1e-07	11.3636
	TRANK1	tetratricopeptide repeat and ankyrin repeat containing 1	< 1e-07	< 1e-07	11.3636
	CDK1	cyclin-dependent kinase 1	< 1e-07	< 1e-07	11.236
	LMNB2	lamin B2	< 1e-07	< 1e-07	11.236
	C12orf5	chromosome 12 open reading frame 5	< 1e-07	< 1e-07	10.989
	PTTG1	pituitary tumor-transforming 1	< 1e-07	< 1e-07	10.6383
	RAD54L	RAD54-like (S. cerevisiae)	< 1e-07	< 1e-07	10.5263
	MFSD2A	major facilitator superfamily domain containing 2A	< 1e-07	< 1e-07	10.4167
	LAMB3	laminin, beta 3	< 1e-07	< 1e-07	10.2041
	TPSAB1	tryptase alpha/beta 1	< 1e-07	< 1e-07	10.101
	TPST2	tyrosylprotein sulfotransferase 2	< 1e-07	< 1e-07	10.101
	MARCO	macrophage receptor with collagenous structure	< 1e-07	< 1e-07	10.101
	MDFI	MyoD family inhibitor	< 1e-07	< 1e-07	10
	TNFRSF21	tumor necrosis factor receptor superfamily, member 21	< 1e-07	< 1e-07	10
	NEAT1	nuclear paraspeckle assembly transcript 1 (non-protein coding)	< 1e-07	< 1e-07	10
	CDC7	cell division cycle 7 homolog (S. cerevisiae)	< 1e-07	< 1e-07	10
	CMIP	c-Maf inducing protein	< 1e-07	< 1e-07	10
	SRPX2	sushi-repeat containing protein, X-linked 2	< 1e-07	< 1e-07	9.09091
	NUP93	nucleoporin 93kDa	< 1e-07	< 1e-07	9.09091
	NUSAP1	nucleolar and spindle associated protein 1	< 1e-07	< 1e-07	9.09091
	PDPN	podoplanin	< 1e-07	< 1e-07	9.09091
	FSCN1	fascin homolog 1, actin-bundling protein (Strongylocentrotus purpuratus)	< 1e-07	< 1e-07	9.09091
	C20orf103	chromosome 20 open reading frame 103	< 1e-07	< 1e-07	9.09091
	WDHD1	WD repeat and HMG-box DNA binding protein 1	< 1e-07	< 1e-07	9.09091
	ZNF786	zinc finger protein 786	< 1e-07	< 1e-07	8.33333
	RHBDL2	rhomboid, veinlet-like 2 (Drosophila)	< 1e-07	< 1e-07	8.33333
	VDR	vitamin D (1,25- dihydroxyvitamin D3) receptor	< 1e-07	< 1e-07	8.33333
	SLC12A4	solute carrier family 12 (potassium/chloride transporters), member 4	< 1e-07	< 1e-07	8.33333
	TIMELESS	timeless homolog (Drosophila)	< 1e-07	< 1e-07	8.33333
	GFI1B	growth factor independent 1B transcription repressor	< 1e-07	< 1e-07	8.33333
	STX6	syntaxin 6	< 1e-07	< 1e-07	8.33333
	ELF4	E74-like factor 4 (ets domain transcription factor)	< 1e-07	< 1e-07	7.69231
	CERS6	ceramide synthase 6	< 1e-07	< 1e-07	7.69231
	OSBPL3	oxysterol binding protein-like 3	< 1e-07	< 1e-07	7.69231
	GPSM2	G-protein signaling modulator 2	< 1e-07	< 1e-07	7.69231
	CREBZF	CREB/ATF bZIP transcription factor	< 1e-07	< 1e-07	7.69231
	FLVCR1	feline leukemia virus subgroup C cellular receptor 1	< 1e-07	< 1e-07	7.14286
	WDFY2	WD repeat and FYVE domain containing 2	< 1e-07	< 1e-07	7.14286
	LOC541471	uncharacterized LOC541471	< 1e-07	< 1e-07	7.14286
	FEM1B	fem-1 homolog b (C. elegans)	< 1e-07	< 1e-07	7.14286
	C19orf39	chromosome 19 open reading frame 39	< 1e-07	< 1e-07	7.14286
	RCN3	reticulocalbin 3, EF-hand calcium binding domain	< 1e-07	< 1e-07	7.14286
	LPCAT4	lysophosphatidylcholine acyltransferase 4	< 1e-07	< 1e-07	7.14286
	LOC100128644	LMNE6487	< 1e-07	< 1e-07	6.66667
	CRMP1	collapsin response mediator protein 1	< 1e-07	< 1e-07	6.66667
	COL4A1	collagen, type IV, alpha 1	< 1e-07	< 1e-07	6.66667
	DPRXP4	divergent-paired related homeobox pseudogene 4	< 1e-07	< 1e-07	6.66667
	PTGFRN	prostaglandin F2 receptor negative regulator	< 1e-07	< 1e-07	6.25
	RAB31	RAB31, member RAS oncogene family	< 1e-07	< 1e-07	6.25
	SPON2	spondin 2, extracellular matrix protein	< 1e-07	< 1e-07	5.88235
	ANTXR1	anthrax toxin receptor 1	< 1e-07	< 1e-07	5.88235
	TNFRSF25	tumor necrosis factor receptor superfamily, member 25	< 1e-07	< 1e-07	5.55556
	MTFP1	mitochondrial fission process 1	< 1e-07	< 1e-07	5.55556
	XPR1	xenotropic and polytropic retrovirus receptor 1	< 1e-07	< 1e-07	5.55556
	LOC100131096	uncharacterized LOC100131096	< 1e-07	< 1e-07	5.55556
	PPARGC1B	peroxisome proliferator-activated receptor gamma, coactivator 1 beta	< 1e-07	< 1e-07	5.55556
	NAT8	N-acetyltransferase 8 (GCN5-related, putative)	< 1e-07	< 1e-07	5.55556
	GPX8	glutathione peroxidase 8 (putative)	< 1e-07	< 1e-07	5.55556
	BCL2L15	BCL2-like 15	< 1e-07	< 1e-07	5.55556
	CHST11	carbohydrate (chondroitin 4) sulfotransferase 11	< 1e-07	< 1e-07	5.26316
	HN1	hematological and neurological expressed 1	< 1e-07	< 1e-07	5.26316
	KPNA2	karyopherin alpha 2 (RAG cohort 1, importin alpha 1)	< 1e-07	< 1e-07	5
	CHGA	chromogranin A (parathyroid secretory protein 1)	< 1e-07	< 1e-07	5
	PKM2	pyruvate kinase, muscle	< 1e-07	< 1e-07	5
	BRI3BP	BRI3 binding protein	< 1e-07	< 1e-07	5
	RCC2	regulator of chromosome condensation 2	< 1e-07	< 1e-07	5
	COQ2	coenzyme Q2 homolog, prenyltransferase (yeast)	< 1e-07	< 1e-07	5
	MICB	MHC class I polypeptide-related sequence B	< 1e-07	< 1e-07	5
	LOC642776	uncharacterized LOC642776	< 1e-07	< 1e-07	4.7619
	SGK494	uncharacterized serine/threonine-protein kinase SgK494	< 1e-07	< 1e-07	4.7619
	MYO18A	myosin XVIIIA	< 1e-07	< 1e-07	4.7619
	TAF1A	TATA box binding protein (TBP)-associated factor, RNA polymerase I, A, 48kDa	< 1e-07	< 1e-07	4.54545
	LOC100272216	uncharacterized LOC100272216	< 1e-07	< 1e-07	4.54545
	SLC22A15	solute carrier family 22, member 15	< 1e-07	< 1e-07	4.54545
	ZDHHC17	zinc finger, DHHC-type containing 17	< 1e-07	< 1e-07	4.34783
	PMFBP1	polyamine modulated factor 1 binding protein 1	< 1e-07	< 1e-07	4.16667
	AMMECR1	Alport syndrome, mental retardation, midface hypoplasia and elliptocytosis chromosomal region gene 1	< 1e-07	< 1e-07	3.84615
	PAPL	iron/zinc purple acid phosphatase-like protein	< 1e-07	< 1e-07	3.7037
	ABCC5	ATP-binding cassette, sub-family C (CFTR/MRP), member 5	< 1e-07	< 1e-07	3.57143
	RNF145	ring finger protein 145	< 1e-07	< 1e-07	3.44828
	HIATL1	hippocampus abundant transcript-like 1	< 1e-07	< 1e-07	3.44828
	WDR91	WD repeat domain 91	< 1e-07	< 1e-07	3.33333
	PCYOX1L	prenylcysteine oxidase 1 like	< 1e-07	< 1e-07	3.22581
	ANKFY1	ankyrin repeat and FYVE domain containing 1	< 1e-07	< 1e-07	3.22581
	TTL	tubulin tyrosine ligase	< 1e-07	< 1e-07	2.94118
	SGPL1	sphingosine-1-phosphate lyase 1	< 1e-07	< 1e-07	2.94118
	ZCCHC14	zinc finger, CCHC domain containing 14	< 1e-07	< 1e-07	2.94118
	ZSCAN12P1	zinc finger and SCAN domain containing 12 pseudogene 1	< 1e-07	< 1e-07	2.94118
	AP4E1	adaptor-related protein complex 4, epsilon 1 subunit	< 1e-07	< 1e-07	2.77778
	MS4A5	membrane-spanning 4-domains, subfamily A, member 5	< 1e-07	< 1e-07	2.63158
	LNPEP	leucyl/cystinyl aminopeptidase	< 1e-07	< 1e-07	2.5
	UFSP2	UFM1-specific peptidase 2	< 1e-07	< 1e-07	-2.49
	BCKDK	branched chain ketoacid dehydrogenase kinase	< 1e-07	< 1e-07	-2.53
	MARK4	MAP/microtubule affinity-regulating kinase 4	< 1e-07	< 1e-07	-2.56
	R3HCC1	R3H domain and coiled-coil containing 1	< 1e-07	< 1e-07	-2.69
	USP16	ubiquitin specific peptidase 16	< 1e-07	< 1e-07	-2.69
	TMEM201	transmembrane protein 201	< 1e-07	< 1e-07	-2.69
	C18orf21	chromosome 18 open reading frame 21	< 1e-07	< 1e-07	-2.71
	APOPT1	apoptogenic 1	< 1e-07	< 1e-07	-2.73
	CNTNAP5	contactin associated protein-like 5	< 1e-07	< 1e-07	-2.74
	CCDC59	coiled-coil domain containing 59	< 1e-07	< 1e-07	-2.76
	RFT1	RFT1 homolog (S. cerevisiae)	< 1e-07	< 1e-07	-2.77
	MRPL21	mitochondrial ribosomal protein L21	< 1e-07	< 1e-07	-2.78
	UBA5	ubiquitin-like modifier activating enzyme 5	< 1e-07	< 1e-07	-2.84
	ANKS1B	ankyrin repeat and sterile alpha motif domain containing 1B	< 1e-07	< 1e-07	-2.85
	LOC388152	uncharacterized LOC388152	< 1e-07	< 1e-07	-2.89
	C10orf137	chromosome 10 open reading frame 137	< 1e-07	< 1e-07	-2.9
	MRPL45	mitochondrial ribosomal protein L45	< 1e-07	< 1e-07	-2.92
	TBC1D15	TBC1 domain family, member 15	< 1e-07	< 1e-07	-2.98
	USE1	unconventional SNARE in the ER 1 homolog (S. cerevisiae)	< 1e-07	< 1e-07	-3.01
	DYM	dymeclin	< 1e-07	< 1e-07	-3.06
	ASNSD1	asparagine synthetase domain containing 1	< 1e-07	< 1e-07	-3.06
	ACE	angiotensin I converting enzyme (peptidyl-dipeptidase A) 1	< 1e-07	< 1e-07	-3.12
	SCFD1	sec1 family domain containing 1	< 1e-07	< 1e-07	-3.14
	AZI2	5-azacytidine induced 2	< 1e-07	< 1e-07	-3.14
	FAM136A	family with sequence similarity 136, member A	< 1e-07	< 1e-07	-3.18
	UROD	uroporphyrinogen decarboxylase	< 1e-07	< 1e-07	-3.23
	RBMY1B	RNA binding motif protein, Y-linked, family 1, member B	< 1e-07	< 1e-07	-3.27
	LOC149950	uncharacterized LOC149950	< 1e-07	< 1e-07	-3.29
	KRTAP4-3	keratin associated protein 4-3	< 1e-07	< 1e-07	-3.31
	DMD	dystrophin	< 1e-07	< 1e-07	-3.34
	C21orf58	chromosome 21 open reading frame 58	< 1e-07	< 1e-07	-3.35
	TMED3	transmembrane emp24 protein transport domain containing 3	< 1e-07	< 1e-07	-3.41
	VPS54	vacuolar protein sorting 54 homolog (S. cerevisiae)	< 1e-07	< 1e-07	-3.42
	RAB4A	RAB4A, member RAS oncogene family	< 1e-07	< 1e-07	-3.49
	CIDECP	cell death-inducing DFFA-like effector c pseudogene	< 1e-07	< 1e-07	-3.5
	TPRKB	TP53RK binding protein	< 1e-07	< 1e-07	-3.51
	PYROXD1	pyridine nucleotide-disulphide oxidoreductase domain 1	< 1e-07	< 1e-07	-3.57
	WASH5P	WAS protein family homolog 5 pseudogene	< 1e-07	< 1e-07	-3.65
	C11orf71	chromosome 11 open reading frame 71	< 1e-07	< 1e-07	-3.65
	INMT	indolethylamine N-methyltransferase	< 1e-07	< 1e-07	-3.66
	LOC100216545	uncharacterized LOC100216545	< 1e-07	< 1e-07	-3.67
	C10orf27	chromosome 10 open reading frame 27	< 1e-07	< 1e-07	-3.71
	TMEM221	transmembrane protein 221	< 1e-07	< 1e-07	-3.75
	CDX1	caudal type homeobox 1	< 1e-07	< 1e-07	-3.76
	THEG	Theg homolog (mouse)	< 1e-07	< 1e-07	-3.8
	LOC645434	uncharacterized LOC645434	< 1e-07	< 1e-07	-3.82
	ACSF3	acyl-CoA synthetase family member 3	< 1e-07	< 1e-07	-3.84
	LOC100130872	uncharacterized LOC100130872	< 1e-07	< 1e-07	-3.91
	NOL12	nucleolar protein 12	< 1e-07	< 1e-07	-3.94
	TCOF1	Treacher Collins-Franceschetti syndrome 1	< 1e-07	< 1e-07	-3.94
	SLC37A3	solute carrier family 37 (glycerol-3-phosphate transporter), member 3	< 1e-07	< 1e-07	-3.97
	CHRM2	cholinergic receptor, muscarinic 2	< 1e-07	< 1e-07	-3.98
	EIF2B3	eukaryotic translation initiation factor 2B, subunit 3 gamma, 58kDa	< 1e-07	< 1e-07	-4.01
	NPIPL3	nuclear pore complex interacting protein-like 3	< 1e-07	< 1e-07	-4.08
	C1orf27	chromosome 1 open reading frame 27	< 1e-07	< 1e-07	-4.09
	LYSMD4	LysM, putative peptidoglycan-binding, domain containing 4	< 1e-07	< 1e-07	-4.1
	DRGX	dorsal root ganglia homeobox	< 1e-07	< 1e-07	-4.2
	PPIL2	peptidylprolyl isomerase (cyclophilin)-like 2	< 1e-07	< 1e-07	-4.22
	C3orf22	chromosome 3 open reading frame 22	< 1e-07	< 1e-07	-4.23
	B3GNT7	UDP-GlcNAc:betaGal beta-1,3-N-acetylglucosaminyltransferase 7	< 1e-07	< 1e-07	-4.36
	HCAR1	hydroxycarboxylic acid receptor 1	< 1e-07	< 1e-07	-4.39
	FABP1	fatty acid binding protein 1, liver	< 1e-07	< 1e-07	-4.4
	EBAG9	estrogen receptor binding site associated, antigen, 9	< 1e-07	< 1e-07	-4.41
	SARDH	sarcosine dehydrogenase	< 1e-07	< 1e-07	-4.41
	RTBDN	retbindin	< 1e-07	< 1e-07	-4.41
	C14orf128	chromosome 14 open reading frame 128	< 1e-07	< 1e-07	-4.43
	OR3A4P	olfactory receptor, family 3, subfamily A, member 4 pseudogene	< 1e-07	< 1e-07	-4.43
	DGCR8	DiGeorge syndrome critical region gene 8	< 1e-07	< 1e-07	-4.44
	HMGCLL1	3-hydroxymethyl-3-methylglutaryl-CoA lyase-like 1	< 1e-07	< 1e-07	-4.45
	EFHC2	EF-hand domain (C-terminal) containing 2	< 1e-07	< 1e-07	-4.45
	LOC100131490	uncharacterized LOC100131490	< 1e-07	< 1e-07	-4.45
	PRADC1	protease-associated domain containing 1	< 1e-07	< 1e-07	-4.46
	LOC729041	fatty acid amide hydrolase pseudogene	< 1e-07	< 1e-07	-4.46
	TRPC4	transient receptor potential cation channel, subfamily C, member 4	< 1e-07	< 1e-07	-4.58
	LOC442366	uncharacterized LOC442366	< 1e-07	< 1e-07	-4.58
	ARMC6	armadillo repeat containing 6	< 1e-07	< 1e-07	-4.59
	FAHD2A	fumarylacetoacetate hydrolase domain containing 2A	< 1e-07	< 1e-07	-4.6
	STX17	syntaxin 17	< 1e-07	< 1e-07	-4.62
	KRTAP3-1	keratin associated protein 3-1	< 1e-07	< 1e-07	-4.63
	CALY	calcyon neuron-specific vesicular protein	< 1e-07	< 1e-07	-4.68
	DGCR6L	DiGeorge syndrome critical region gene 6-like	< 1e-07	< 1e-07	-4.68
	SEL1L2	sel-1 suppressor of lin-12-like 2 (C. elegans)	< 1e-07	< 1e-07	-4.74
	CSRNP3	cysteine-serine-rich nuclear protein 3	< 1e-07	< 1e-07	-4.75
	ACAT1	acetyl-CoA acetyltransferase 1	< 1e-07	< 1e-07	-4.76
	ANKRD24	ankyrin repeat domain 24	< 1e-07	< 1e-07	-4.83
	FMNL3	formin-like 3	< 1e-07	< 1e-07	-4.84
	FLJ40039	uncharacterized LOC647662	< 1e-07	< 1e-07	-4.89
	ABCC1	ATP-binding cassette, sub-family C (CFTR/MRP), member 1	< 1e-07	< 1e-07	-4.89
	LOC729173	uncharacterized LOC729173	< 1e-07	< 1e-07	-4.92
	C7orf64	chromosome 7 open reading frame 64	< 1e-07	< 1e-07	-4.93
	ITIH6	inter-alpha-trypsin inhibitor heavy chain family, member 6	< 1e-07	< 1e-07	-4.94
	LINGO4	leucine rich repeat and Ig domain containing 4	< 1e-07	< 1e-07	-5
	LMAN1L	lectin, mannose-binding, 1 like	< 1e-07	< 1e-07	-5.02
	ATL1	atlastin GTPase 1	< 1e-07	< 1e-07	-5.03
	TECPR1	tectonin beta-propeller repeat containing 1	< 1e-07	< 1e-07	-5.04
	LOC283585	uncharacterized LOC283585	< 1e-07	< 1e-07	-5.15
	ZBTB11	zinc finger and BTB domain containing 11	< 1e-07	< 1e-07	-5.19
	VPRBP	Vpr (HIV-1) binding protein	< 1e-07	< 1e-07	-5.2
	KCNMA1	potassium large conductance calcium-activated channel, subfamily M, alpha member 1	< 1e-07	< 1e-07	-5.32
	LOC643339	uncharacterized LOC643339	< 1e-07	< 1e-07	-5.4
	PKIG	protein kinase (cAMP-dependent, catalytic) inhibitor gamma	< 1e-07	< 1e-07	-5.41
	LINC00494	long intergenic non-protein coding RNA 494	< 1e-07	< 1e-07	-5.42
	ACTR3BP5	ARP3 actin-related protein 3 homolog B (yeast) pseudogene 5	< 1e-07	< 1e-07	-5.49
	TMEM63B	transmembrane protein 63B	< 1e-07	< 1e-07	-5.49
	KIAA1024	KIAA1024	< 1e-07	< 1e-07	-5.51
	FAM189B	family with sequence similarity 189, member B	< 1e-07	< 1e-07	-5.52
	MORC1	MORC family CW-type zinc finger 1	< 1e-07	< 1e-07	-5.53
	B3GNTL1	UDP-GlcNAc:betaGal beta-1,3-N-acetylglucosaminyltransferase-like 1	< 1e-07	< 1e-07	-5.57
	SLC20A2	solute carrier family 20 (phosphate transporter), member 2	< 1e-07	< 1e-07	-5.59
	FLJ33630	uncharacterized LOC644873	< 1e-07	< 1e-07	-5.62
	LOC100268168	uncharacterized LOC100268168	< 1e-07	< 1e-07	-5.63
	PPAPDC1B	phosphatidic acid phosphatase type 2 domain containing 1B	< 1e-07	< 1e-07	-5.67
	MRPL23-AS1	MRPL23 antisense RNA 1 (non-protein coding)	< 1e-07	< 1e-07	-5.68
	LDHD	lactate dehydrogenase D	< 1e-07	< 1e-07	-5.7
	FIBCD1	fibrinogen C domain containing 1	< 1e-07	< 1e-07	-5.78
	FES	feline sarcoma oncogene	< 1e-07	< 1e-07	-5.8
	TPD52L1	tumor protein D52-like 1	< 1e-07	< 1e-07	-5.8
	PRDM11	PR domain containing 11	< 1e-07	< 1e-07	-5.92
	AIF1	allograft inflammatory factor 1	< 1e-07	< 1e-07	-6.04
	EDN3	endothelin 3	< 1e-07	< 1e-07	-6.04
	TBX6	T-box 6	< 1e-07	< 1e-07	-6.06
	MAD2L2	MAD2 mitotic arrest deficient-like 2 (yeast)	< 1e-07	< 1e-07	-6.23
	KCNAB1	potassium voltage-gated channel, shaker-related subfamily, beta member 1	< 1e-07	< 1e-07	-6.24
	TMEM52	transmembrane protein 52	< 1e-07	< 1e-07	-6.26
	LMF1	lipase maturation factor 1	< 1e-07	< 1e-07	-6.27
	IL17RB	interleukin 17 receptor B	< 1e-07	< 1e-07	-6.29
	CHST1	carbohydrate (keratan sulfate Gal-6) sulfotransferase 1	< 1e-07	< 1e-07	-6.3
	LOC100132593	uncharacterized LOC100132593	< 1e-07	< 1e-07	-6.32
	PRKACB	protein kinase, cAMP-dependent, catalytic, beta	< 1e-07	< 1e-07	-6.33
	FAM13A	family with sequence similarity 13, member A	< 1e-07	< 1e-07	-6.51
	LSR	lipolysis stimulated lipoprotein receptor	< 1e-07	< 1e-07	-6.53
	KLF15	Kruppel-like factor 15	< 1e-07	< 1e-07	-6.56
	CNOT3	CCR4-NOT transcription complex, subunit 3	< 1e-07	< 1e-07	-6.57
	FKBP8	FK506 binding protein 8, 38kDa	< 1e-07	< 1e-07	-6.59
	AGFG2	ArfGAP with FG repeats 2	< 1e-07	< 1e-07	-6.61
	CEP41	centrosomal protein 41kDa	< 1e-07	< 1e-07	-6.72
	DCLK2	doublecortin-like kinase 2	< 1e-07	< 1e-07	-6.77
	MFGE8	milk fat globule-EGF factor 8 protein	< 1e-07	< 1e-07	-6.77
	GDF7	growth differentiation factor 7	< 1e-07	< 1e-07	-6.79
	FLJ35946	uncharacterized protein FLJ35946	< 1e-07	< 1e-07	-6.83
	PLEKHF1	pleckstrin homology domain containing, family F (with FYVE domain) member 1	< 1e-07	< 1e-07	-6.9
	OR1S1	olfactory receptor, family 1, subfamily S, member 1	< 1e-07	< 1e-07	-6.96
	PIK3AP1	phosphoinositide-3-kinase adaptor protein 1	< 1e-07	< 1e-07	-7
	KLK1	kallikrein 1	< 1e-07	< 1e-07	-7.01
	LOC284379	solute carrier family 7 (cationic amino acid transporter, y+ system), member 3 pseudogene	< 1e-07	< 1e-07	-7.09
	ANO1	anoctamin 1, calcium activated chloride channel	< 1e-07	< 1e-07	-7.32
	TAS2R7	taste receptor, type 2, member 7	< 1e-07	< 1e-07	-7.33
	PHOSPHO2	phosphatase, orphan 2	< 1e-07	< 1e-07	-7.34
	FER1L5	fer-1-like 5 (C. elegans)	< 1e-07	< 1e-07	-7.4
	GTPBP5	GTP binding protein 5 (putative)	< 1e-07	< 1e-07	-7.41
	PLCB1	phospholipase C, beta 1 (phosphoinositide-specific)	< 1e-07	< 1e-07	-7.58
	FLJ42875	uncharacterized LOC440556	< 1e-07	< 1e-07	-7.6
	C19orf29	chromosome 19 open reading frame 29	< 1e-07	< 1e-07	-7.63
	SLC39A8	solute carrier family 39 (zinc transporter), member 8	< 1e-07	< 1e-07	-7.64
	C9orf9	chromosome 9 open reading frame 9	< 1e-07	< 1e-07	-7.65
	KRTAP4-12	keratin associated protein 4-12	< 1e-07	< 1e-07	-7.89
	MAMSTR	MEF2 activating motif and SAP domain containing transcriptional regulator	< 1e-07	< 1e-07	-8.02
	HIF3A	hypoxia inducible factor 3, alpha subunit	< 1e-07	< 1e-07	-8.06
	RTN2	reticulon 2	< 1e-07	< 1e-07	-8.15
	PRKAG3	protein kinase, AMP-activated, gamma 3 non-catalytic subunit	< 1e-07	< 1e-07	-8.15
	SCN7A	sodium channel, voltage-gated, type VII, alpha	< 1e-07	< 1e-07	-8.17
	FMO5	flavin containing monooxygenase 5	< 1e-07	< 1e-07	-8.36
	SFXN3	sideroflexin 3	< 1e-07	< 1e-07	-8.4
	NDRG2	NDRG family member 2	< 1e-07	< 1e-07	-8.41
	MYO5C	myosin VC	< 1e-07	< 1e-07	-8.43
	TPPP2	tubulin polymerization-promoting protein family member 2	< 1e-07	< 1e-07	-8.48
	LONRF3	LON peptidase N-terminal domain and ring finger 3	< 1e-07	< 1e-07	-8.51
	LOC100128511	uncharacterized LOC100128511	< 1e-07	< 1e-07	-8.55
	SPRNP1	shadow of prion protein homolog (zebrafish) pseudogene 1	< 1e-07	< 1e-07	-8.65
	LOC441461	uncharacterized LOC441461	< 1e-07	< 1e-07	-8.66
	LOC647946	uncharacterized LOC647946	< 1e-07	< 1e-07	-8.66
	ALDH1L1	aldehyde dehydrogenase 1 family, member L1	< 1e-07	< 1e-07	-8.69
	CCDC110	coiled-coil domain containing 110	< 1e-07	< 1e-07	-8.76
	LOC113230	uncharacterized LOC113230	< 1e-07	< 1e-07	-8.76
	SFI1	Sfi1 homolog, spindle assembly associated (yeast)	< 1e-07	< 1e-07	-8.8
	MARC1	mitochondrial amidoxime reducing component 1	< 1e-07	< 1e-07	-8.96
	FUT8	fucosyltransferase 8 (alpha (1,6) fucosyltransferase)	< 1e-07	< 1e-07	-9.08
	STX19	syntaxin 19	< 1e-07	< 1e-07	-9.2
	LOC100132197	uncharacterized LOC100132197	< 1e-07	< 1e-07	-9.26
	DEPTOR	DEP domain containing MTOR-interacting protein	< 1e-07	< 1e-07	-9.27
	HSH2D	hematopoietic SH2 domain containing	< 1e-07	< 1e-07	-9.28
	HNRNPUL1	heterogeneous nuclear ribonucleoprotein U-like 1	< 1e-07	< 1e-07	-9.28
	C1orf190	chromosome 1 open reading frame 190	< 1e-07	< 1e-07	-9.29
	PPP1R36	protein phosphatase 1, regulatory subunit 36	< 1e-07	< 1e-07	-9.32
	LOC100287879	uncharacterized LOC100287879	< 1e-07	< 1e-07	-9.36
	PRSS54	protease, serine, 54	< 1e-07	< 1e-07	-9.36
	C10orf90	chromosome 10 open reading frame 90	< 1e-07	< 1e-07	-9.42
	PDCD4	programmed cell death 4 (neoplastic transformation inhibitor)	< 1e-07	< 1e-07	-9.42
	FLJ27352	uncharacterized LOC145788	< 1e-07	< 1e-07	-9.46
	FLJ12825	uncharacterized LOC440101	< 1e-07	< 1e-07	-9.55
	FAM162B	family with sequence similarity 162, member B	< 1e-07	< 1e-07	-9.62
	C5orf27	chromosome 5 open reading frame 27	< 1e-07	< 1e-07	-9.62
	C16orf96	chromosome 16 open reading frame 96	< 1e-07	< 1e-07	-9.64
	DHRS7	dehydrogenase/reductase (SDR family) member 7	< 1e-07	< 1e-07	-9.68
	IGLV1-44	immunoglobulin lambda variable 1-44	< 1e-07	< 1e-07	-9.85
	AGMAT	agmatine ureohydrolase (agmatinase)	< 1e-07	< 1e-07	-9.87
	FAM90A10	family with sequence similarity 90, member A10	< 1e-07	< 1e-07	-10.04
	CLPS	colipase, pancreatic	< 1e-07	< 1e-07	-10.08
	OR9G4	olfactory receptor, family 9, subfamily G, member 4	< 1e-07	< 1e-07	-10.1
	C9orf71	chromosome 9 open reading frame 71	< 1e-07	< 1e-07	-10.1
	PPP1R1B	protein phosphatase 1, regulatory (inhibitor) subunit 1B	< 1e-07	< 1e-07	-10.21
	PSG11	pregnancy specific beta-1-glycoprotein 11	< 1e-07	< 1e-07	-10.52
	STXBP6	syntaxin binding protein 6 (amisyn)	< 1e-07	< 1e-07	-10.54
	GPR176	G protein-coupled receptor 176	< 1e-07	< 1e-07	-10.67
	DNA2	DNA replication helicase 2 homolog (yeast)	< 1e-07	< 1e-07	-10.72
	C16orf89	chromosome 16 open reading frame 89	< 1e-07	< 1e-07	-10.75
	OR9Q2	olfactory receptor, family 9, subfamily Q, member 2	< 1e-07	< 1e-07	-10.8
	COL28A1	collagen, type XXVIII, alpha 1	< 1e-07	< 1e-07	-10.86
	GNMT	glycine N-methyltransferase	< 1e-07	< 1e-07	-10.95
	LPO	lactoperoxidase	< 1e-07	< 1e-07	-11.04
	C11orf75	chromosome 11 open reading frame 75	< 1e-07	< 1e-07	-11.05
	PLIN1	perilipin 1	< 1e-07	< 1e-07	-11.06
	TMEM61	transmembrane protein 61	< 1e-07	< 1e-07	-11.08
	MAD2L1BP	MAD2L1 binding protein	< 1e-07	< 1e-07	-11.12
	UMOD	uromodulin	< 1e-07	< 1e-07	-11.14
	GGTA1P	glycoprotein, alpha-galactosyltransferase 1 pseudogene	< 1e-07	< 1e-07	-11.2
	PLEKHD1	pleckstrin homology domain containing, family D (with coiled-coil domains) member 1	< 1e-07	< 1e-07	-11.35
	MYBL2	v-myb myeloblastosis viral oncogene homolog (avian)-like 2	< 1e-07	< 1e-07	-11.64
	CLDND2	claudin domain containing 2	< 1e-07	< 1e-07	-11.7
	SLC31A2	solute carrier family 31 (copper transporters), member 2	< 1e-07	< 1e-07	-11.77
	SCRT2	scratch homolog 2, zinc finger protein (Drosophila)	< 1e-07	< 1e-07	-11.85
	FAM186B	family with sequence similarity 186, member B	< 1e-07	< 1e-07	-11.89
	DKK4	dickkopf homolog 4 (Xenopus laevis)	< 1e-07	< 1e-07	-11.92
	FMO6P	flavin containing monooxygenase 6 pseudogene	< 1e-07	< 1e-07	-11.93
	CA4	carbonic anhydrase IV	< 1e-07	< 1e-07	-12.01
	PAIP2B	poly(A) binding protein interacting protein 2B	< 1e-07	< 1e-07	-12.12
	GSTA3	glutathione S-transferase alpha 3	< 1e-07	< 1e-07	-12.2
	AZGP1	alpha-2-glycoprotein 1, zinc-binding	< 1e-07	< 1e-07	-12.24
	TMEM132B	transmembrane protein 132B	< 1e-07	< 1e-07	-12.35
	LOC388588	uncharacterized LOC388588	< 1e-07	< 1e-07	-12.39
	IQGAP2	IQ motif containing GTPase activating protein 2	< 1e-07	< 1e-07	-12.4
	GPR157	G protein-coupled receptor 157	< 1e-07	< 1e-07	-12.43
	FNDC5	fibronectin type III domain containing 5	< 1e-07	< 1e-07	-12.73
	C21orf56	chromosome 21 open reading frame 56	< 1e-07	< 1e-07	-12.73
	TRPV6	transient receptor potential cation channel, subfamily V, member 6	< 1e-07	< 1e-07	-12.75
	ADH1B	alcohol dehydrogenase 1B (class I), beta polypeptide	< 1e-07	< 1e-07	-12.82
	DMWD	dystrophia myotonica, WD repeat containing	< 1e-07	< 1e-07	-12.98
	NNAT	neuronatin	< 1e-07	< 1e-07	-13.01
	BPIFB2	BPI fold containing family B, member 2	< 1e-07	< 1e-07	-13.17
	STMN3	stathmin-like 3	< 1e-07	< 1e-07	-13.24
	FAM129A	family with sequence similarity 129, member A	< 1e-07	< 1e-07	-13.3
	ST3GAL6	ST3 beta-galactoside alpha-2,3-sialyltransferase 6	< 1e-07	< 1e-07	-13.37
	LOC400657	uncharacterized LOC400657	< 1e-07	< 1e-07	-13.38
	ASCL3	achaete-scute complex homolog 3 (Drosophila)	< 1e-07	< 1e-07	-13.55
	C14orf41	chromosome 14 open reading frame 41	< 1e-07	< 1e-07	-13.62
	GPR64	G protein-coupled receptor 64	< 1e-07	< 1e-07	-13.62
	ALG12	asparagine-linked glycosylation 12, alpha-1,6-mannosyltransferase homolog (S. cerevisiae)	< 1e-07	< 1e-07	-13.68
	LMX1B	LIM homeobox transcription factor 1, beta	< 1e-07	< 1e-07	-13.76
	KLHL14	kelch-like 14 (Drosophila)	< 1e-07	< 1e-07	-13.84
	ZNF688	zinc finger protein 688	< 1e-07	< 1e-07	-14.13
	FOLH1	folate hydrolase (prostate-specific membrane antigen) 1	< 1e-07	< 1e-07	-14.38
	DKFZP434A062	uncharacterized LOC26102	< 1e-07	< 1e-07	-14.83
	RBPJL	recombination signal binding protein for immunoglobulin kappa J region-like	< 1e-07	< 1e-07	-14.98
	OSTalpha	organic solute transporter alpha	< 1e-07	< 1e-07	-15
	FOLH1B	folate hydrolase 1B	< 1e-07	< 1e-07	-15.18
	C7orf34	chromosome 7 open reading frame 34	< 1e-07	< 1e-07	-15.59
	NPRL2	nitrogen permease regulator-like 2 (S. cerevisiae)	< 1e-07	< 1e-07	-16.07
	NUCB2	nucleobindin 2	< 1e-07	< 1e-07	-16.17
	SH3BGRL2	SH3 domain binding glutamic acid-rich protein like 2	< 1e-07	< 1e-07	-16.36
	PDE3B	phosphodiesterase 3B, cGMP-inhibited	< 1e-07	< 1e-07	-16.6
	GATM	glycine amidinotransferase (L-arginine:glycine amidinotransferase)	< 1e-07	< 1e-07	-17.02
	SLC1A2	solute carrier family 1 (glial high affinity glutamate transporter), member 2	< 1e-07	< 1e-07	-17.19
	CSTF2T	cleavage stimulation factor, 3' pre-RNA, subunit 2, 64kDa, tau variant	< 1e-07	< 1e-07	-17.3
	FLJ34208	uncharacterized LOC401106	< 1e-07	< 1e-07	-17.66
	FAM55B	family with sequence similarity 55, member B	< 1e-07	< 1e-07	-17.81
	C2orf88	chromosome 2 open reading frame 88	< 1e-07	< 1e-07	-18.16
	OR5A2	olfactory receptor, family 5, subfamily A, member 2	< 1e-07	< 1e-07	-18.63
	MYOC	myocilin, trabecular meshwork inducible glucocorticoid response	< 1e-07	< 1e-07	-18.71
	GPIHBP1	glycosylphosphatidylinositol anchored high density lipoprotein binding protein 1	< 1e-07	< 1e-07	-19.19
	SGSM3	small G protein signaling modulator 3	< 1e-07	< 1e-07	-19.27
	LOC723809	uncharacterized LOC723809	< 1e-07	< 1e-07	-19.34
	SCML2	sex comb on midleg-like 2 (Drosophila)	< 1e-07	< 1e-07	-20.05
	ENPP3	ectonucleotide pyrophosphatase/phosphodiesterase 3	< 1e-07	< 1e-07	-20.15
	RCAN2	regulator of calcineurin 2	< 1e-07	< 1e-07	-20.5
	FAM3D	family with sequence similarity 3, member D	< 1e-07	< 1e-07	-21.22
	CA6	carbonic anhydrase VI	< 1e-07	< 1e-07	-21.22
	ETV1	ets variant 1	< 1e-07	< 1e-07	-21.46
	PSRC1	proline/serine-rich coiled-coil 1	< 1e-07	< 1e-07	-22.13
	ABCC6	ATP-binding cassette, sub-family C (CFTR/MRP), member 6	< 1e-07	< 1e-07	-22.54
	LY9	lymphocyte antigen 9	< 1e-07	< 1e-07	-23.22
	HTR1B	5-hydroxytryptamine (serotonin) receptor 1B	< 1e-07	< 1e-07	-23.37
	ABCC6P1	ATP-binding cassette, sub-family C, member 6 pseudogene 1	< 1e-07	< 1e-07	-23.38
	LOC100129826	uncharacterized LOC100129826	< 1e-07	< 1e-07	-23.39
	LIN37	lin-37 homolog (C. elegans)	< 1e-07	< 1e-07	-23.44
	LOC100507073	uncharacterized LOC100507073	< 1e-07	< 1e-07	-23.46
	ADH1A	alcohol dehydrogenase 1A (class I), alpha polypeptide	< 1e-07	< 1e-07	-23.62
	NEURL3	neuralized homolog 3 (Drosophila) pseudogene	< 1e-07	< 1e-07	-23.63
	OR5F1	olfactory receptor, family 5, subfamily F, member 1	< 1e-07	< 1e-07	-23.64
	PLIN5	perilipin 5	< 1e-07	< 1e-07	-23.66
	PPYR1	pancreatic polypeptide receptor 1	< 1e-07	< 1e-07	-24.25
	ACSS3	acyl-CoA synthetase short-chain family member 3	< 1e-07	< 1e-07	-25.13
	C18orf62	chromosome 18 open reading frame 62	< 1e-07	< 1e-07	-25.19
	PLCB4	phospholipase C, beta 4	< 1e-07	< 1e-07	-26.09
	LOC100131657	uncharacterized LOC100131657	< 1e-07	< 1e-07	-26.37
	LOC440313	uncharacterized LOC440313	< 1e-07	< 1e-07	-26.74
	ADRB1	adrenergic, beta-1-, receptor	< 1e-07	< 1e-07	-27.41
	ACADL	acyl-CoA dehydrogenase, long chain	< 1e-07	< 1e-07	-28.07
	LOC644050	uncharacterized LOC644050	< 1e-07	< 1e-07	-29.33
	MUCL1	mucin-like 1	< 1e-07	< 1e-07	-29.68
	CRTC1	CREB regulated transcription coactivator 1	< 1e-07	< 1e-07	-30.06
	BCAN	brevican	< 1e-07	< 1e-07	-31.39
	C5orf46	chromosome 5 open reading frame 46	< 1e-07	< 1e-07	-31.39
	ASGR2	asialoglycoprotein receptor 2	< 1e-07	< 1e-07	-31.57
	LOC643486	bromodomain, testis-specific pseudogene	< 1e-07	< 1e-07	-32.15
	CCDC160	coiled-coil domain containing 160	< 1e-07	< 1e-07	-33.08
	FAM3B	family with sequence similarity 3, member B	< 1e-07	< 1e-07	-33.11
	CLDN8	claudin 8	< 1e-07	< 1e-07	-33.74
	ALPP	alkaline phosphatase, placental	< 1e-07	< 1e-07	-33.94
	SERPINA6	serpin peptidase inhibitor, clade A (alpha-1 antiproteinase, antitrypsin), member 6	< 1e-07	< 1e-07	-34.14
	CAMP	cathelicidin antimicrobial peptide	< 1e-07	< 1e-07	-35.28
	CSN1S2AP	casein alpha s2-like A, pseudogene	< 1e-07	< 1e-07	-35.73
	C1QTNF3	C1q and tumor necrosis factor related protein 3	< 1e-07	< 1e-07	-35.86
	LOC1720	dihydrofolate reductase pseudogene	< 1e-07	< 1e-07	-37.2
	OR51F1	olfactory receptor, family 51, subfamily F, member 1	< 1e-07	< 1e-07	-37.24
	FAM19A5	family with sequence similarity 19 (chemokine (C-C motif)-like), member A5	< 1e-07	< 1e-07	-37.51
	PIK3C2G	phosphoinositide-3-kinase, class 2, gamma polypeptide	< 1e-07	< 1e-07	-38.55
	WIF1	WNT inhibitory factor 1	< 1e-07	< 1e-07	-40.75
	DNASE2B	deoxyribonuclease II beta	< 1e-07	< 1e-07	-41.64
	ACSM2A	acyl-CoA synthetase medium-chain family member 2A	< 1e-07	< 1e-07	-41.96
	DPP4	dipeptidyl-peptidase 4	< 1e-07	< 1e-07	-48.1
	LOC285626	uncharacterized LOC285626	< 1e-07	< 1e-07	-49.02
	LOC127841	uncharacterized LOC127841	< 1e-07	< 1e-07	-49.37
	CD163L1	CD163 molecule-like 1	< 1e-07	< 1e-07	-49.49
	BLM	Bloom syndrome, RecQ helicase-like	< 1e-07	< 1e-07	-50.91
	PPP2R4	protein phosphatase 2A activator, regulatory subunit 4	< 1e-07	< 1e-07	-52.05
	CPLX2	complexin 2	< 1e-07	< 1e-07	-54.29
	NOSTRIN	nitric oxide synthase trafficker	< 1e-07	< 1e-07	-54.96
	RUSC2	RUN and SH3 domain containing 2	< 1e-07	< 1e-07	-57.1
	TONSL	tonsoku-like, DNA repair protein	< 1e-07	< 1e-07	-59.79
	DSTYK	dual serine/threonine and tyrosine protein kinase	< 1e-07	< 1e-07	-60.04
	TRIM53P	tripartite motif containing 53, pseudogene	< 1e-07	< 1e-07	-64.25
	PART1	prostate androgen-regulated transcript 1 (non-protein coding)	< 1e-07	< 1e-07	-67.22
	PCDHB13	protocadherin beta 13	< 1e-07	< 1e-07	-67.31
	CPLX3	complexin 3	< 1e-07	< 1e-07	-77.6
	FAM55D	family with sequence similarity 55, member D	< 1e-07	< 1e-07	-85.12
	PRB1	proline-rich protein BstNI subfamily 1	< 1e-07	< 1e-07	-87.1
	STATH	statherin	< 1e-07	< 1e-07	-94.01
	CCDC106	coiled-coil domain containing 106	< 1e-07	< 1e-07	-95.68
	LOC284215	uncharacterized LOC284215	< 1e-07	< 1e-07	-96.45
	CGB	chorionic gonadotropin, beta polypeptide	< 1e-07	< 1e-07	-116.99
	KCNH1	potassium voltage-gated channel, subfamily H (eag-related), member 1	< 1e-07	< 1e-07	-131.12
	GPR45	G protein-coupled receptor 45	< 1e-07	< 1e-07	-213.05
	HTN1	histatin 1	< 1e-07	< 1e-07	-238.46
	AMY1C	amylase, alpha 1C (salivary)	< 1e-07	< 1e-07	-253.75
	PRH2	proline-rich protein HaeIII subfamily 2	< 1e-07	< 1e-07	-284.07
	SLC25A47	solute carrier family 25, member 47	< 1e-07	< 1e-07	-333.68
	SPDYC	speedy homolog C (Xenopus laevis)	< 1e-07	< 1e-07	-375.62
	LOC651536	immunoglobulin omega chain-like	< 1e-07	< 1e-07	-416.95
	PRB3	proline-rich protein BstNI subfamily 3	< 1e-07	< 1e-07	-889.19
	PRB4	proline-rich protein BstNI subfamily 4	< 1e-07	< 1e-07	-3152.57
	S100A8	S100 calcium binding protein A8	< 1e-07	3.34e-06	121.951
	ATP2C2	ATPase, Ca++ transporting, type 2C, member 2	< 1e-07	3.34e-06	62.5
	DQX1	DEAQ box RNA-dependent ATPase 1	1e-07	3.34e-06	23.8095
	EDIL3	EGF-like repeats and discoidin I-like domains 3	< 1e-07	3.34e-06	23.2558
	FAP	fibroblast activation protein, alpha	1e-07	3.34e-06	14.2857
	GINS1	GINS complex subunit 1 (Psf1 homolog)	< 1e-07	3.34e-06	13.8889
	LOX	lysyl oxidase	1e-07	3.34e-06	12.1951
	ZNF469	zinc finger protein 469	< 1e-07	3.34e-06	11.9048
	PARD6G	par-6 partitioning defective 6 homolog gamma (C. elegans)	1e-07	3.34e-06	11.236
	VCAN	versican	< 1e-07	3.34e-06	9.09091
	IL18	interleukin 18 (interferon-gamma-inducing factor)	1e-07	3.34e-06	9.09091
	TMEM217	transmembrane protein 217	1e-07	3.34e-06	8.33333
	SERPINH1	serpin peptidase inhibitor, clade H (heat shock protein 47), member 1, (collagen binding protein 1)	< 1e-07	3.34e-06	7.69231
	NCOA3	nuclear receptor coactivator 3	< 1e-07	3.34e-06	7.14286
	TNFRSF6B	tumor necrosis factor receptor superfamily, member 6b, decoy	< 1e-07	3.34e-06	7.14286
	APLN	apelin	< 1e-07	3.34e-06	6.66667
	COL5A3	collagen, type V, alpha 3	< 1e-07	3.34e-06	6.66667
	CELSR2	cadherin, EGF LAG seven-pass G-type receptor 2 (flamingo homolog, Drosophila)	< 1e-07	3.34e-06	6.25
	MMP14	matrix metallopeptidase 14 (membrane-inserted)	1e-07	3.34e-06	5.55556
	TBC1D2	TBC1 domain family, member 2	1e-07	3.34e-06	5.55556
	TRIM14	tripartite motif containing 14	< 1e-07	3.34e-06	5
	SGK223	homolog of rat pragma of Rnd2	1e-07	3.34e-06	5
	LOC100132099	FRSS1829	< 1e-07	3.34e-06	4.34783
	LRP11	low density lipoprotein receptor-related protein 11	1e-07	3.34e-06	4.34783
	MFSD10	major facilitator superfamily domain containing 10	< 1e-07	3.34e-06	4.16667
	STAM	signal transducing adaptor molecule (SH3 domain and ITAM motif) 1	< 1e-07	3.34e-06	4.16667
	FRS3	fibroblast growth factor receptor substrate 3	< 1e-07	3.34e-06	3.84615
	SLC5A6	solute carrier family 5 (sodium-dependent vitamin transporter), member 6	< 1e-07	3.34e-06	3.7037
	ZNF783	zinc finger family member 783	< 1e-07	3.34e-06	3.57143
	LOC400743	uncharacterized LOC400743	< 1e-07	3.34e-06	3.57143
	ASB1	ankyrin repeat and SOCS box containing 1	< 1e-07	3.34e-06	3.44828
	CUL7	cullin 7	1e-07	3.34e-06	3.44828
	GDAP2	ganglioside induced differentiation associated protein 2	1e-07	3.34e-06	3.33333
	NPHP4	nephronophthisis 4	< 1e-07	3.34e-06	3.22581
	NAP1L4	nucleosome assembly protein 1-like 4	< 1e-07	3.34e-06	3.125
	PRDX1	peroxiredoxin 1	1e-07	3.34e-06	3.125
	MBOAT7	membrane bound O-acyltransferase domain containing 7	< 1e-07	3.34e-06	3.0303
	IL4R	interleukin 4 receptor	< 1e-07	3.34e-06	3.0303
	BAZ1A	bromodomain adjacent to zinc finger domain, 1A	< 1e-07	3.34e-06	2.85714
	TEAD4	TEA domain family member 4	1e-07	3.34e-06	2.77778
	ANKRD13D	ankyrin repeat domain 13 family, member D	1e-07	3.34e-06	2.7027
	NCKAP5L	NCK-associated protein 5-like	< 1e-07	3.34e-06	2.43902
	WDR44	WD repeat domain 44	1e-07	3.34e-06	2.32558
	MTMR10	myotubularin related protein 10	< 1e-07	3.34e-06	-2.36
	C2orf3	chromosome 2 open reading frame 3	< 1e-07	3.34e-06	-2.4
	METTL5	methyltransferase like 5	1e-07	3.34e-06	-2.73
	SLC7A14	solute carrier family 7 (orphan transporter), member 14	1e-07	3.34e-06	-2.89
	CCDC121	coiled-coil domain containing 121	1e-07	3.34e-06	-3.02
	NECAB1	N-terminal EF-hand calcium binding protein 1	1e-07	3.34e-06	-3.05
	TACR2	tachykinin receptor 2	1e-07	3.34e-06	-3.05
	PCDHA7	protocadherin alpha 7	1e-07	3.34e-06	-3.1
	TMEM181	transmembrane protein 181	< 1e-07	3.34e-06	-3.12
	C22orf46	chromosome 22 open reading frame 46	< 1e-07	3.34e-06	-3.13
	ACTR3B	ARP3 actin-related protein 3 homolog B (yeast)	1e-07	3.34e-06	-3.17
	HADH	hydroxyacyl-CoA dehydrogenase	< 1e-07	3.34e-06	-3.19
	AGPHD1	aminoglycoside phosphotransferase domain containing 1	1e-07	3.34e-06	-3.21
	CTBS	chitobiase, di-N-acetyl-	< 1e-07	3.34e-06	-3.25
	SECISBP2L	SECIS binding protein 2-like	< 1e-07	3.34e-06	-3.37
	ALDH18A1	aldehyde dehydrogenase 18 family, member A1	< 1e-07	3.34e-06	-3.4
	MARC2	mitochondrial amidoxime reducing component 2	1e-07	3.34e-06	-3.43
	ATP2B2	ATPase, Ca++ transporting, plasma membrane 2	1e-07	3.34e-06	-3.44
	LOC286382	uncharacterized LOC286382	< 1e-07	3.34e-06	-3.47
	RWDD1	RWD domain containing 1	1e-07	3.34e-06	-3.51
	ITPRIPL1	inositol 1,4,5-trisphosphate receptor interacting protein-like 1	< 1e-07	3.34e-06	-3.63
	OR10H2	olfactory receptor, family 10, subfamily H, member 2	< 1e-07	3.34e-06	-3.78
	GPR146	G protein-coupled receptor 146	< 1e-07	3.34e-06	-3.81
	SMCR2	Smith-Magenis syndrome chromosome region, candidate 2 (non-protein coding)	1e-07	3.34e-06	-3.89
	C19orf53	chromosome 19 open reading frame 53	< 1e-07	3.34e-06	-4.2
	EPS8L3	EPS8-like 3	< 1e-07	3.34e-06	-4.25
	TAS1R3	taste receptor, type 1, member 3	1e-07	3.34e-06	-4.39
	PSD	pleckstrin and Sec7 domain containing	< 1e-07	3.34e-06	-4.5
	ACSS1	acyl-CoA synthetase short-chain family member 1	< 1e-07	3.34e-06	-4.5
	STMN1	stathmin 1	1e-07	3.34e-06	-4.52
	FRAT2	frequently rearranged in advanced T-cell lymphomas 2	1e-07	3.34e-06	-4.58
	ANKAR	ankyrin and armadillo repeat containing	1e-07	3.34e-06	-4.88
	AMN	amnionless homolog (mouse)	< 1e-07	3.34e-06	-4.92
	C5orf54	chromosome 5 open reading frame 54	< 1e-07	3.34e-06	-4.93
	FOXC1	forkhead box C1	< 1e-07	3.34e-06	-4.94
	BARX2	BARX homeobox 2	< 1e-07	3.34e-06	-5.01
	GMNC	geminin coiled-coil domain containing	1e-07	3.34e-06	-5.02
	WNK4	WNK lysine deficient protein kinase 4	< 1e-07	3.34e-06	-5.13
	ADARB2-AS1	ADARB2 antisense RNA 1 (non-protein coding)	1e-07	3.34e-06	-5.72
	HCRT	hypocretin (orexin) neuropeptide precursor	< 1e-07	3.34e-06	-5.81
	GRAMD1C	GRAM domain containing 1C	1e-07	3.34e-06	-5.91
	RAB17	RAB17, member RAS oncogene family	1e-07	3.34e-06	-5.97
	ADARB2	adenosine deaminase, RNA-specific, B2	1e-07	3.34e-06	-6.25
	AMACR	alpha-methylacyl-CoA racemase	< 1e-07	3.34e-06	-6.32
	MGAT4A	mannosyl (alpha-1,3-)-glycoprotein beta-1,4-N-acetylglucosaminyltransferase, isozyme A	1e-07	3.34e-06	-7.04
	ADCY4	adenylate cyclase 4	1e-07	3.34e-06	-7.15
	LOC100127888	uncharacterized LOC100127888	< 1e-07	3.34e-06	-7.22
	ANGPTL1	angiopoietin-like 1	< 1e-07	3.34e-06	-7.45
	CSF2RB	colony stimulating factor 2 receptor, beta, low-affinity (granulocyte-macrophage)	1e-07	3.34e-06	-7.87
	AQP5	aquaporin 5	< 1e-07	3.34e-06	-7.93
	VIT	vitrin	1e-07	3.34e-06	-8
	RASGEF1C	RasGEF domain family, member 1C	1e-07	3.34e-06	-8.07
	KAT2B	K(lysine) acetyltransferase 2B	< 1e-07	3.34e-06	-8.59
	UGT2B10	UDP glucuronosyltransferase 2 family, polypeptide B10	< 1e-07	3.34e-06	-9.43
	S100A1	S100 calcium binding protein A1	< 1e-07	3.34e-06	-9.67
	SLITRK5	SLIT and NTRK-like family, member 5	1e-07	3.34e-06	-10.08
	NYX	nyctalopin	1e-07	3.34e-06	-10.82
	LOC285326	uncharacterized LOC285326	1e-07	3.34e-06	-10.94
	CXXC4	CXXC finger protein 4	< 1e-07	3.34e-06	-12.07
	CHRM3	cholinergic receptor, muscarinic 3	< 1e-07	3.34e-06	-15.44
	EGF	epidermal growth factor	< 1e-07	3.34e-06	-18.51
	LOC100507650	RING finger protein C14orf164-like	< 1e-07	3.34e-06	-26.54
	DHRS2	dehydrogenase/reductase (SDR family) member 2	< 1e-07	3.34e-06	-29.68
	AGXT2L1	alanine-glyoxylate aminotransferase 2-like 1	< 1e-07	3.34e-06	-61.35
	DNER	delta/notch-like EGF repeat containing	< 1e-07	3.34e-06	-62.58
	ASB5	ankyrin repeat and SOCS box containing 5	< 1e-07	3.34e-06	-70.13
	HOXB6	homeobox B6	2e-07	6.08e-06	16.129
	HEY1	hairy/enhancer-of-split related with YRPW motif 1	2e-07	6.08e-06	13.8889
	HJURP	Holliday junction recognition protein	2e-07	6.08e-06	12.5
	SFN	stratifin	2e-07	6.08e-06	11.7647
	COL8A1	collagen, type VIII, alpha 1	2e-07	6.08e-06	7.14286
	ITGA3	integrin, alpha 3 (antigen CD49C, alpha 3 subunit of VLA-3 receptor)	2e-07	6.08e-06	7.14286
	SMAD2	SMAD family member 2	2e-07	6.08e-06	6.66667
	THY1	Thy-1 cell surface antigen	2e-07	6.08e-06	6.25
	SLC44A1	solute carrier family 44, member 1	2e-07	6.08e-06	6.25
	COL18A1	collagen, type XVIII, alpha 1	2e-07	6.08e-06	5.88235
	RNF213	ring finger protein 213	2e-07	6.08e-06	5.88235
	AGPAT5	1-acylglycerol-3-phosphate O-acyltransferase 5 (lysophosphatidic acid acyltransferase, epsilon)	2e-07	6.08e-06	5.55556
	GJC1	gap junction protein, gamma 1, 45kDa	2e-07	6.08e-06	5.55556
	HERC2P4	hect domain and RLD 2 pseudogene 4	2e-07	6.08e-06	5.26316
	LTBP2	latent transforming growth factor beta binding protein 2	2e-07	6.08e-06	5.26316
	DHCR7	7-dehydrocholesterol reductase	2e-07	6.08e-06	4.54545
	TTC13	tetratricopeptide repeat domain 13	2e-07	6.08e-06	4.34783
	HKDC1	hexokinase domain containing 1	2e-07	6.08e-06	4.16667
	KIFC2	kinesin family member C2	2e-07	6.08e-06	4
	AXIN2	axin 2	2e-07	6.08e-06	4
	PLXDC1	plexin domain containing 1	2e-07	6.08e-06	3.7037
	CENPO	centromere protein O	2e-07	6.08e-06	3.7037
	LOC283922	pyruvate dehydrogenase phosphatase regulatory subunit pseudogene	2e-07	6.08e-06	3.33333
	RCOR1	REST corepressor 1	2e-07	6.08e-06	3.33333
	EIF4G3	eukaryotic translation initiation factor 4 gamma, 3	2e-07	6.08e-06	2.63158
	SF3B3	splicing factor 3b, subunit 3, 130kDa	2e-07	6.08e-06	2.5
	COG6	component of oligomeric golgi complex 6	2e-07	6.08e-06	-2.17
	MCCC1	methylcrotonoyl-CoA carboxylase 1 (alpha)	2e-07	6.08e-06	-2.37
	KLHL8	kelch-like 8 (Drosophila)	2e-07	6.08e-06	-2.52
	TIMM9	translocase of inner mitochondrial membrane 9 homolog (yeast)	2e-07	6.08e-06	-2.58
	MAP3K1	mitogen-activated protein kinase kinase kinase 1	2e-07	6.08e-06	-2.77
	MAST1	microtubule associated serine/threonine kinase 1	2e-07	6.08e-06	-2.88
	C21orf49	chromosome 21 open reading frame 49	2e-07	6.08e-06	-2.93
	NPM2	nucleophosmin/nucleoplasmin 2	2e-07	6.08e-06	-3.12
	FAM102B	family with sequence similarity 102, member B	2e-07	6.08e-06	-3.2
	LOC644246	uncharacterized LOC644246	2e-07	6.08e-06	-3.27
	TRIM6	tripartite motif containing 6	2e-07	6.08e-06	-3.5
	PIK3C2A	phosphoinositide-3-kinase, class 2, alpha polypeptide	2e-07	6.08e-06	-3.51
	WASF1	WAS protein family, member 1	2e-07	6.08e-06	-3.59
	RFX6	regulatory factor X, 6	2e-07	6.08e-06	-3.6
	SNHG9	small nucleolar RNA host gene 9 (non-protein coding)	2e-07	6.08e-06	-3.84
	REXO1	REX1, RNA exonuclease 1 homolog (S. cerevisiae)	2e-07	6.08e-06	-4
	LYG2	lysozyme G-like 2	2e-07	6.08e-06	-4.23
	FGF22	fibroblast growth factor 22	2e-07	6.08e-06	-4.74
	OR2D2	olfactory receptor, family 2, subfamily D, member 2	2e-07	6.08e-06	-4.83
	TGFBR3	transforming growth factor, beta receptor III	2e-07	6.08e-06	-5.25
	LOC645769	uncharacterized LOC645769	2e-07	6.08e-06	-5.62
	RAB15	RAB15, member RAS onocogene family	2e-07	6.08e-06	-5.75
	KIAA1244	KIAA1244	2e-07	6.08e-06	-5.8
	NMUR1	neuromedin U receptor 1	2e-07	6.08e-06	-5.97
	LOC731789	uncharacterized LOC731789	2e-07	6.08e-06	-6.1
	PBOV1	prostate and breast cancer overexpressed 1	2e-07	6.08e-06	-6.15
	ACTG2	actin, gamma 2, smooth muscle, enteric	2e-07	6.08e-06	-7.41
	MAPT	microtubule-associated protein tau	2e-07	6.08e-06	-10.38
	CCL28	chemokine (C-C motif) ligand 28	2e-07	6.08e-06	-11.17
	RGN	regucalcin (senescence marker protein-30)	2e-07	6.08e-06	-11.69
	REG1A	regenerating islet-derived 1 alpha	2e-07	6.08e-06	-17.24
	ROPN1	rhophilin associated tail protein 1	2e-07	6.08e-06	-18.03
	SERPINB3	serpin peptidase inhibitor, clade B (ovalbumin), member 3	3e-07	8.37e-06	90.9091
	NMU	neuromedin U	3e-07	8.37e-06	52.6316
	OIP5	Opa interacting protein 5	3e-07	8.37e-06	13.1579
	HOXD1	homeobox D1	3e-07	8.37e-06	11.1111
	EZH2	enhancer of zeste homolog 2 (Drosophila)	3e-07	8.37e-06	8.33333
	DTL	denticleless homolog (Drosophila)	3e-07	8.37e-06	8.33333
	C6orf58	chromosome 6 open reading frame 58	3e-07	8.37e-06	8.33333
	FAM201B	family with sequence similarity 201, member B	3e-07	8.37e-06	6.25
	RHBDF2	rhomboid 5 homolog 2 (Drosophila)	3e-07	8.37e-06	6.25
	VANGL2	vang-like 2 (van gogh, Drosophila)	3e-07	8.37e-06	5.88235
	SEMA3F	sema domain, immunoglobulin domain (Ig), short basic domain, secreted, (semaphorin) 3F	3e-07	8.37e-06	5.88235
	ACOT7	acyl-CoA thioesterase 7	3e-07	8.37e-06	5.26316
	HS6ST1	heparan sulfate 6-O-sulfotransferase 1	3e-07	8.37e-06	5
	INPP1	inositol polyphosphate-1-phosphatase	3e-07	8.37e-06	5
	ARPC1B	actin related protein 2/3 complex, subunit 1B, 41kDa	3e-07	8.37e-06	5
	NRF1	nuclear respiratory factor 1	3e-07	8.37e-06	4.7619
	SLAMF9	SLAM family member 9	3e-07	8.37e-06	4.7619
	URB2	URB2 ribosome biogenesis 2 homolog (S. cerevisiae)	3e-07	8.37e-06	4.34783
	TTF2	transcription termination factor, RNA polymerase II	3e-07	8.37e-06	4.16667
	ULK4	unc-51-like kinase 4 (C. elegans)	3e-07	8.37e-06	4.16667
	RAP2B	RAP2B, member of RAS oncogene family	3e-07	8.37e-06	3.84615
	NAV1	neuron navigator 1	3e-07	8.37e-06	3.7037
	SLC18A3	solute carrier family 18 (vesicular acetylcholine), member 3	3e-07	8.37e-06	3.57143
	DIAPH1	diaphanous homolog 1 (Drosophila)	3e-07	8.37e-06	3.57143
	BYSL	bystin-like	3e-07	8.37e-06	3.22581
	PHLDA3	pleckstrin homology-like domain, family A, member 3	3e-07	8.37e-06	3.22581
	UBA1	ubiquitin-like modifier activating enzyme 1	3e-07	8.37e-06	3.22581
	ATP6AP2	ATPase, H+ transporting, lysosomal accessory protein 2	3e-07	8.37e-06	2.94118
	STX12	syntaxin 12	3e-07	8.37e-06	-2.22
	VTI1B	vesicle transport through interaction with t-SNAREs homolog 1B (yeast)	3e-07	8.37e-06	-2.39
	FAF1	Fas (TNFRSF6) associated factor 1	3e-07	8.37e-06	-2.43
	TAB2	TGF-beta activated kinase 1/MAP3K7 binding protein 2	3e-07	8.37e-06	-2.43
	NBR1	neighbor of BRCA1 gene 1	3e-07	8.37e-06	-2.68
	FBXO10	F-box protein 10	3e-07	8.37e-06	-2.69
	EIF3J	eukaryotic translation initiation factor 3, subunit J	3e-07	8.37e-06	-2.7
	NDST2	N-deacetylase/N-sulfotransferase (heparan glucosaminyl) 2	3e-07	8.37e-06	-2.71
	CCDC149	coiled-coil domain containing 149	3e-07	8.37e-06	-2.77
	PPP1R15B	protein phosphatase 1, regulatory subunit 15B	3e-07	8.37e-06	-2.87
	C14orf93	chromosome 14 open reading frame 93	3e-07	8.37e-06	-2.91
	FBXO6	F-box protein 6	3e-07	8.37e-06	-3.05
	LOC100506639	uncharacterized LOC100506639	3e-07	8.37e-06	-3.12
	KRTAP10-5	keratin associated protein 10-5	3e-07	8.37e-06	-3.23
	QDPR	quinoid dihydropteridine reductase	3e-07	8.37e-06	-3.45
	RBAK-LOC389458	RBAK-LOC389458 readthrough	3e-07	8.37e-06	-4.01
	TEAD3	TEA domain family member 3	3e-07	8.37e-06	-4.35
	PLIN4	perilipin 4	3e-07	8.37e-06	-4.46
	CD3EAP	CD3e molecule, epsilon associated protein	3e-07	8.37e-06	-4.8
	C1orf170	chromosome 1 open reading frame 170	3e-07	8.37e-06	-5.11
	GRIA4	glutamate receptor, ionotrophic, AMPA 4	3e-07	8.37e-06	-5.26
	CECR5-AS1	CECR5 antisense RNA 1 (non-protein coding)	3e-07	8.37e-06	-5.5
	MLLT3	myeloid/lymphoid or mixed-lineage leukemia (trithorax homolog, Drosophila); translocated to, 3	3e-07	8.37e-06	-5.9
	MSGN1	mesogenin 1	3e-07	8.37e-06	-5.96
	NKX1-2	NK1 homeobox 2	3e-07	8.37e-06	-6.47
	LOC645431	uncharacterized LOC645431	3e-07	8.37e-06	-7.5
	FLJ46552	FLJ46552 protein	3e-07	8.37e-06	-7.73
	QPRT	quinolinate phosphoribosyltransferase	3e-07	8.37e-06	-8.25
	LOC100289094	uncharacterized LOC100289094	3e-07	8.37e-06	-9.51
	TCEAL2	transcription elongation factor A (SII)-like 2	3e-07	8.37e-06	-11.61
	TSPAN12	tetraspanin 12	3e-07	8.37e-06	-18.3
	FPR3	formyl peptide receptor 3	4e-07	1.06e-05	11.9048
	SDCBP2	syndecan binding protein (syntenin) 2	4e-07	1.06e-05	10.5263
	ZWINT	ZW10 interactor	4e-07	1.06e-05	10
	CDH13	cadherin 13, H-cadherin (heart)	4e-07	1.06e-05	7.69231
	PSD3	pleckstrin and Sec7 domain containing 3	4e-07	1.06e-05	7.14286
	BASP1	brain abundant, membrane attached signal protein 1	4e-07	1.06e-05	5.55556
	NCDN	neurochondrin	4e-07	1.06e-05	5.26316
	C2orf18	chromosome 2 open reading frame 18	4e-07	1.06e-05	5.26316
	KCNJ2	potassium inwardly-rectifying channel, subfamily J, member 2	4e-07	1.06e-05	5
	CYP11B1	cytochrome P450, family 11, subfamily B, polypeptide 1	4e-07	1.06e-05	4.7619
	LGALS9C	lectin, galactoside-binding, soluble, 9C	4e-07	1.06e-05	4.34783
	TSKU	tsukushi small leucine rich proteoglycan homolog (Xenopus laevis)	4e-07	1.06e-05	4.16667
	SLMO1	slowmo homolog 1 (Drosophila)	4e-07	1.06e-05	4
	ADAM10	ADAM metallopeptidase domain 10	4e-07	1.06e-05	3.33333
	TAS2R9	taste receptor, type 2, member 9	4e-07	1.06e-05	3.22581
	KRAS	v-Ki-ras2 Kirsten rat sarcoma viral oncogene homolog	4e-07	1.06e-05	3.22581
	TRIO	triple functional domain (PTPRF interacting)	4e-07	1.06e-05	3.125
	ATP2A2	ATPase, Ca++ transporting, cardiac muscle, slow twitch 2	4e-07	1.06e-05	2.85714
	SLU7	SLU7 splicing factor homolog (S. cerevisiae)	4e-07	1.06e-05	-2.26
	MCFD2	multiple coagulation factor deficiency 2	4e-07	1.06e-05	-2.67
	HNF1B	HNF1 homeobox B	4e-07	1.06e-05	-2.9
	APIP	APAF1 interacting protein	4e-07	1.06e-05	-3.18
	HBQ1	hemoglobin, theta 1	4e-07	1.06e-05	-3.2
	HSPB9	heat shock protein, alpha-crystallin-related, B9	4e-07	1.06e-05	-3.2
	FAM63A	family with sequence similarity 63, member A	4e-07	1.06e-05	-3.27
	NCKIPSD	NCK interacting protein with SH3 domain	4e-07	1.06e-05	-3.85
	TOR2A	torsin family 2, member A	4e-07	1.06e-05	-3.91
	SNAR-B1	small ILF3/NF90-associated RNA B1	4e-07	1.06e-05	-4.09
	FAM174B	family with sequence similarity 174, member B	4e-07	1.06e-05	-5.1
	DKFZp779M0652	uncharacterized DKFZp779M0652	4e-07	1.06e-05	-5.16
	MYOG	myogenin (myogenic factor 4)	4e-07	1.06e-05	-5.34
	ALOXE3	arachidonate lipoxygenase 3	4e-07	1.06e-05	-5.95
	EDN1	endothelin 1	4e-07	1.06e-05	-6.87
	MEIS2	Meis homeobox 2	4e-07	1.06e-05	-11.95
	FAM138E	family with sequence similarity 138, member E	4e-07	1.06e-05	-13.9
	FAM171B	family with sequence similarity 171, member B	4e-07	1.06e-05	-23.12
	SLC7A5	solute carrier family 7 (amino acid transporter light chain, L system), member 5	5e-07	1.28e-05	27.7778
	HPSE	heparanase	5e-07	1.28e-05	11.4943
	C12orf69	chromosome 12 open reading frame 69	5e-07	1.28e-05	7.69231
	RAP2A	RAP2A, member of RAS oncogene family	5e-07	1.28e-05	7.69231
	TYSND1	trypsin domain containing 1	5e-07	1.28e-05	7.69231
	LEF1	lymphoid enhancer-binding factor 1	5e-07	1.28e-05	6.25
	MLL4	myeloid/lymphoid or mixed-lineage leukemia 4	5e-07	1.28e-05	5.55556
	PLP2	proteolipid protein 2 (colonic epithelium-enriched)	5e-07	1.28e-05	4.54545
	TMEM48	transmembrane protein 48	5e-07	1.28e-05	3.22581
	GNL3L	guanine nucleotide binding protein-like 3 (nucleolar)-like	5e-07	1.28e-05	2.85714
	ZDHHC7	zinc finger, DHHC-type containing 7	5e-07	1.28e-05	2.63158
	THAP7	THAP domain containing 7	5e-07	1.28e-05	-2.56
	PALMD	palmdelphin	5e-07	1.28e-05	-2.73
	ARHGAP40	Rho GTPase activating protein 40	5e-07	1.28e-05	-2.93
	C12orf45	chromosome 12 open reading frame 45	5e-07	1.28e-05	-2.95
	TMPRSS6	transmembrane protease, serine 6	5e-07	1.28e-05	-2.95
	TAAR2	trace amine associated receptor 2	5e-07	1.28e-05	-3.94
	RWDD2A	RWD domain containing 2A	5e-07	1.28e-05	-4.14
	OR52W1	olfactory receptor, family 52, subfamily W, member 1	5e-07	1.28e-05	-4.18
	GNG7	guanine nucleotide binding protein (G protein), gamma 7	5e-07	1.28e-05	-5.71
	CELA3A	chymotrypsin-like elastase family, member 3A	5e-07	1.28e-05	-5.75
	C10orf125	chromosome 10 open reading frame 125	5e-07	1.28e-05	-5.75
	SEC11C	SEC11 homolog C (S. cerevisiae)	5e-07	1.28e-05	-7.27
	PLK3	polo-like kinase 3	5e-07	1.28e-05	-9.61
	C1orf168	chromosome 1 open reading frame 168	5e-07	1.28e-05	-10.35
	PRR5L	proline rich 5 like	6e-07	1.5e-05	10.7527
	RYR1	ryanodine receptor 1 (skeletal)	6e-07	1.5e-05	6.66667
	TRAF3	TNF receptor-associated factor 3	6e-07	1.5e-05	5.55556
	SIGLEC6	sialic acid binding Ig-like lectin 6	6e-07	1.5e-05	4.7619
	NUDT19	nudix (nucleoside diphosphate linked moiety X)-type motif 19	6e-07	1.5e-05	4.16667
	LOC391636	chromosome 9 open reading frame 78 pseudogene	6e-07	1.5e-05	3.7037
	POGLUT1	protein O-glucosyltransferase 1	6e-07	1.5e-05	3.22581
	ATP2B4	ATPase, Ca++ transporting, plasma membrane 4	6e-07	1.5e-05	2.94118
	FHOD1	formin homology 2 domain containing 1	6e-07	1.5e-05	2.77778
	TDG	thymine-DNA glycosylase	6e-07	1.5e-05	2.7027
	RPL28	ribosomal protein L28	6e-07	1.5e-05	2.27273
	ZFP161	zinc finger protein 161 homolog (mouse)	6e-07	1.5e-05	-2.44
	SLC35C2	solute carrier family 35, member C2	6e-07	1.5e-05	-2.72
	CCDC157	coiled-coil domain containing 157	6e-07	1.5e-05	-3.01
	EIF3E	eukaryotic translation initiation factor 3, subunit E	6e-07	1.5e-05	-3.03
	SOX8	SRY (sex determining region Y)-box 8	6e-07	1.5e-05	-4.23
	ProSAPiP1	ProSAPiP1 protein	6e-07	1.5e-05	-4.26
	LOC100130071	GSQS6193	6e-07	1.5e-05	-5.97
	WWC1	WW and C2 domain containing 1	6e-07	1.5e-05	-6.88
	MFI2	antigen p97 (melanoma associated) identified by monoclonal antibodies 133.2 and 96.5	6e-07	1.5e-05	-8.46
	INSIG1	insulin induced gene 1	6e-07	1.5e-05	-8.74
	MSLN	mesothelin	7e-07	1.68e-05	22.7273
	FUT3	fucosyltransferase 3 (galactoside 3(4)-L-fucosyltransferase, Lewis blood group)	7e-07	1.68e-05	21.7391
	LOC100128563	uncharacterized LOC100128563	7e-07	1.68e-05	9.09091
	LOC728978	uncharacterized LOC728978	7e-07	1.68e-05	8.33333
	JAG2	jagged 2	7e-07	1.68e-05	8.33333
	PVRL1	poliovirus receptor-related 1 (herpesvirus entry mediator C)	7e-07	1.68e-05	7.14286
	BRCA1	breast cancer 1, early onset	7e-07	1.68e-05	6.25
	LOC400548	uncharacterized LOC400548	7e-07	1.68e-05	5.26316
	BMP2	bone morphogenetic protein 2	7e-07	1.68e-05	5
	HIST1H4F	histone cluster 1, H4f	7e-07	1.68e-05	4.7619
	LOC100286979	anaphase-promoting complex subunit 1-like	7e-07	1.68e-05	4
	FLJ25363	uncharacterized LOC401082	7e-07	1.68e-05	3.33333
	PUS1	pseudouridylate synthase 1	7e-07	1.68e-05	2.85714
	KIAA0090	KIAA0090	7e-07	1.68e-05	2.5
	PRAMEF20	PRAME family member 20	7e-07	1.68e-05	-2.07
	DNTTIP2	deoxynucleotidyltransferase, terminal, interacting protein 2	7e-07	1.68e-05	-2.25
	ERCC1	excision repair cross-complementing rodent repair deficiency, complementation group 1 (includes overlapping antisense sequence)	7e-07	1.68e-05	-2.43
	COQ7	coenzyme Q7 homolog, ubiquinone (yeast)	7e-07	1.68e-05	-2.5
	IGBP1	immunoglobulin (CD79A) binding protein 1	7e-07	1.68e-05	-2.61
	SPOPL	speckle-type POZ protein-like	7e-07	1.68e-05	-2.71
	TSPAN33	tetraspanin 33	7e-07	1.68e-05	-3.07
	TNXB	tenascin XB	7e-07	1.68e-05	-3.14
	KCNAB3	potassium voltage-gated channel, shaker-related subfamily, beta member 3	7e-07	1.68e-05	-3.14
	NIP7	nuclear import 7 homolog (S. cerevisiae)	7e-07	1.68e-05	-3.68
	CABLES1	Cdk5 and Abl enzyme substrate 1	7e-07	1.68e-05	-4.05
	C20orf151	chromosome 20 open reading frame 151	7e-07	1.68e-05	-4.12
	GRIN2C	glutamate receptor, ionotropic, N-methyl D-aspartate 2C	7e-07	1.68e-05	-4.85
	ZDHHC15	zinc finger, DHHC-type containing 15	7e-07	1.68e-05	-5.52
	PPAT	phosphoribosyl pyrophosphate amidotransferase	7e-07	1.68e-05	-6.52
	LRRN2	leucine rich repeat neuronal 2	7e-07	1.68e-05	-7.91
	C1orf130	chromosome 1 open reading frame 130	7e-07	1.68e-05	-15.19
	MALL	mal, T-cell differentiation protein-like	8e-07	1.89e-05	10
	FAT2	FAT tumor suppressor homolog 2 (Drosophila)	8e-07	1.89e-05	8.33333
	TMEM51	transmembrane protein 51	8e-07	1.89e-05	3.7037
	BMP2K	BMP2 inducible kinase	8e-07	1.89e-05	3.57143
	PMS2P4	postmeiotic segregation increased 2 pseudogene 4	8e-07	1.89e-05	3.125
	CACNB3	calcium channel, voltage-dependent, beta 3 subunit	8e-07	1.89e-05	2.7027
	MCTS1	malignant T cell amplified sequence 1	8e-07	1.89e-05	-2.36
	DEFB129	defensin, beta 129	8e-07	1.89e-05	-3.73
	GPR119	G protein-coupled receptor 119	8e-07	1.89e-05	-4.09
	LOC285281	uncharacterized LOC285281	8e-07	1.89e-05	-4.42
	LIMCH1	LIM and calponin homology domains 1	8e-07	1.89e-05	-4.59
	SUN5	Sad1 and UNC84 domain containing 5	8e-07	1.89e-05	-4.93
	PAX7	paired box 7	8e-07	1.89e-05	-5.03
	RBP4	retinol binding protein 4, plasma	8e-07	1.89e-05	-6.59
	CKMT2	creatine kinase, mitochondrial 2 (sarcomeric)	8e-07	1.89e-05	-14.66
	SULF1	sulfatase 1	9e-07	2.07e-05	9.09091
	ADAM8	ADAM metallopeptidase domain 8	9e-07	2.07e-05	7.14286
	LOC729603	calcium binding protein P22 pseudogene	9e-07	2.07e-05	5.26316
	EHBP1L1	EH domain binding protein 1-like 1	9e-07	2.07e-05	4.34783
	UBTF	upstream binding transcription factor, RNA polymerase I	9e-07	2.07e-05	4
	UHRF1	ubiquitin-like with PHD and ring finger domains 1	9e-07	2.07e-05	3.84615
	NCLN	nicalin	9e-07	2.07e-05	2.5641
	SKIV2L	superkiller viralicidic activity 2-like (S. cerevisiae)	9e-07	2.07e-05	2.32558
	KIAA1598	KIAA1598	9e-07	2.07e-05	-2.06
	CEBPZ	CCAAT/enhancer binding protein (C/EBP), zeta	9e-07	2.07e-05	-2.13
	SNX2	sorting nexin 2	9e-07	2.07e-05	-2.6
	SPATA2L	spermatogenesis associated 2-like	9e-07	2.07e-05	-2.69
	SLC25A42	solute carrier family 25, member 42	9e-07	2.07e-05	-2.78
	LOC340357	uncharacterized LOC340357	9e-07	2.07e-05	-2.95
	TMEM8C	transmembrane protein 8C	9e-07	2.07e-05	-2.96
	POLB	polymerase (DNA directed), beta	9e-07	2.07e-05	-3.4
	DTWD1	DTW domain containing 1	9e-07	2.07e-05	-3.46
	CARHSP1	calcium regulated heat stable protein 1, 24kDa	9e-07	2.07e-05	-3.63
	CTPS	CTP synthase	9e-07	2.07e-05	-4.42
	NKAIN4	Na+/K+ transporting ATPase interacting 4	9e-07	2.07e-05	-6.57
	LOC389493	uncharacterized LOC389493	9e-07	2.07e-05	-6.62
	MMP28	matrix metallopeptidase 28	9e-07	2.07e-05	-10.47
	C9orf152	chromosome 9 open reading frame 152	9e-07	2.07e-05	-15.4
	SLC7A11	solute carrier family 7 (anionic amino acid transporter light chain, xc- system), member 11	1e-06	2.26e-05	18.1818
	GOLM1	golgi membrane protein 1	1e-06	2.26e-05	7.14286
	RAB33A	RAB33A, member RAS oncogene family	1e-06	2.26e-05	6.66667
	C1orf106	chromosome 1 open reading frame 106	1e-06	2.26e-05	6.25
	CEP89	centrosomal protein 89kDa	1e-06	2.26e-05	5.26316
	GPR137	G protein-coupled receptor 137	1e-06	2.26e-05	3.57143
	ZNF337	zinc finger protein 337	1e-06	2.26e-05	3.44828
	EXOC8	exocyst complex component 8	1e-06	2.26e-05	2.27273
	BRWD1-IT2	BRWD1 intronic transcript 2 (non-protein coding)	1e-06	2.26e-05	-2.63
	METAP1D	methionyl aminopeptidase type 1D (mitochondrial)	1e-06	2.26e-05	-2.77
	VSX1	visual system homeobox 1	1e-06	2.26e-05	-3.07
	CAPN12	calpain 12	1e-06	2.26e-05	-3.35
	SNX22	sorting nexin 22	1e-06	2.26e-05	-5.17
	DMRTA1	DMRT-like family A1	1e-06	2.26e-05	-5.19
	MYLK	myosin light chain kinase	1e-06	2.26e-05	-5.37
	ANGPT1	angiopoietin 1	1e-06	2.26e-05	-9.15
	AKR1B10	aldo-keto reductase family 1, member B10 (aldose reductase)	1.1e-06	2.43e-05	11.236
	PBK	PDZ binding kinase	1.1e-06	2.43e-05	10.7527
	IRF6	interferon regulatory factor 6	1.1e-06	2.43e-05	7.69231
	CPEB2	cytoplasmic polyadenylation element binding protein 2	1.1e-06	2.43e-05	6.25
	S100A10	S100 calcium binding protein A10	1.1e-06	2.43e-05	5.26316
	CD209	CD209 molecule	1.1e-06	2.43e-05	3.44828
	GRAMD4	GRAM domain containing 4	1.1e-06	2.43e-05	2.85714
	MAFG	v-maf musculoaponeurotic fibrosarcoma oncogene homolog G (avian)	1.1e-06	2.43e-05	2.27273
	ARL6IP4	ADP-ribosylation-like factor 6 interacting protein 4	1.1e-06	2.43e-05	-2.12
	SEPHS1	selenophosphate synthetase 1	1.1e-06	2.43e-05	-2.52
	CAMK2G	calcium/calmodulin-dependent protein kinase II gamma	1.1e-06	2.43e-05	-2.72
	CCDC125	coiled-coil domain containing 125	1.1e-06	2.43e-05	-3.07
	LRFN1	leucine rich repeat and fibronectin type III domain containing 1	1.1e-06	2.43e-05	-3.27
	LOC100508384	uncharacterized LOC100508384	1.1e-06	2.43e-05	-3.53
	LOC100129196	uncharacterized LOC100129196	1.1e-06	2.43e-05	-4.24
	EDNRB	endothelin receptor type B	1.1e-06	2.43e-05	-4.32
	DSCC1	defective in sister chromatid cohesion 1 homolog (S. cerevisiae)	1.1e-06	2.43e-05	-4.78
	CLEC4M	C-type lectin domain family 4, member M	1.1e-06	2.43e-05	-5.01
	PROX2	prospero homeobox 2	1.1e-06	2.43e-05	-8.93
	LOC643201	centrosomal protein 192kDa pseudogene	1.1e-06	2.43e-05	-10.31
	CENPF	centromere protein F, 350/400kDa (mitosin)	1.2e-06	2.6e-05	6.66667
	PIGW	phosphatidylinositol glycan anchor biosynthesis, class W	1.2e-06	2.6e-05	5.88235
	MCM4	minichromosome maintenance complex component 4	1.2e-06	2.6e-05	5.88235
	RRP1B	ribosomal RNA processing 1 homolog B (S. cerevisiae)	1.2e-06	2.6e-05	4.54545
	LETM1	leucine zipper-EF-hand containing transmembrane protein 1	1.2e-06	2.6e-05	3.7037
	APPL2	adaptor protein, phosphotyrosine interaction, PH domain and leucine zipper containing 2	1.2e-06	2.6e-05	2.5641
	C8orf56	chromosome 8 open reading frame 56	1.2e-06	2.6e-05	-2.43
	ACR	acrosin	1.2e-06	2.6e-05	-2.51
	ZNF252	zinc finger protein 252	1.2e-06	2.6e-05	-2.79
	FAM73B	family with sequence similarity 73, member B	1.2e-06	2.6e-05	-3.09
	CIDEC	cell death-inducing DFFA-like effector c	1.2e-06	2.6e-05	-3.29
	TBC1D9	TBC1 domain family, member 9 (with GRAM domain)	1.2e-06	2.6e-05	-3.59
	RAB9B	RAB9B, member RAS oncogene family	1.2e-06	2.6e-05	-4.28
	VPS37D	vacuolar protein sorting 37 homolog D (S. cerevisiae)	1.2e-06	2.6e-05	-4.99
	C1orf133	chromosome 1 open reading frame 133	1.2e-06	2.6e-05	-6.66
	HHATL	hedgehog acyltransferase-like	1.2e-06	2.6e-05	-7.8
	KCNE3	potassium voltage-gated channel, Isk-related family, member 3	1.3e-06	2.77e-05	7.69231
	STYK1	serine/threonine/tyrosine kinase 1	1.3e-06	2.77e-05	5.88235
	SLC39A10	solute carrier family 39 (zinc transporter), member 10	1.3e-06	2.77e-05	5
	PLEKHH3	pleckstrin homology domain containing, family H (with MyTH4 domain) member 3	1.3e-06	2.77e-05	3.7037
	KANSL3	KAT8 regulatory NSL complex subunit 3	1.3e-06	2.77e-05	3.22581
	CLIP4	CAP-GLY domain containing linker protein family, member 4	1.3e-06	2.77e-05	3.0303
	PCGF3	polycomb group ring finger 3	1.3e-06	2.77e-05	2.12766
	WBP2	WW domain binding protein 2	1.3e-06	2.77e-05	-2.08
	C5orf55	chromosome 5 open reading frame 55	1.3e-06	2.77e-05	-2.62
	HYI	hydroxypyruvate isomerase (putative)	1.3e-06	2.77e-05	-2.78
	KLF11	Kruppel-like factor 11	1.3e-06	2.77e-05	-2.96
	ECSIT	ECSIT homolog (Drosophila)	1.3e-06	2.77e-05	-3.07
	FLJ45445	uncharacterized LOC399844	1.3e-06	2.77e-05	-3.08
	PSG9	pregnancy specific beta-1-glycoprotein 9	1.3e-06	2.77e-05	-3.33
	CCL15	chemokine (C-C motif) ligand 15	1.3e-06	2.77e-05	-4.69
	CDCP1	CUB domain containing protein 1	1.4e-06	2.96e-05	5.88235
	GALNT2	UDP-N-acetyl-alpha-D-galactosamine:polypeptide N-acetylgalactosaminyltransferase 2 (GalNAc-T2)	1.4e-06	2.96e-05	5.26316
	GOLGA8F	golgin A8 family, member F	1.4e-06	2.96e-05	5
	HDAC10	histone deacetylase 10	1.4e-06	2.96e-05	4.7619
	THOC6	THO complex 6 homolog (Drosophila)	1.4e-06	2.96e-05	-2.41
	TMCO2	transmembrane and coiled-coil domains 2	1.4e-06	2.96e-05	-2.72
	OTOS	otospiralin	1.4e-06	2.96e-05	-3.52
	TAC1	tachykinin, precursor 1	1.4e-06	2.96e-05	-10.3
	MMP1	matrix metallopeptidase 1 (interstitial collagenase)	1.5e-06	3.15e-05	9.09091
	OSGIN2	oxidative stress induced growth inhibitor family member 2	1.5e-06	3.15e-05	4.54545
	TOP1	topoisomerase (DNA) I	1.5e-06	3.15e-05	3.0303
	WWOX	WW domain containing oxidoreductase	1.5e-06	3.15e-05	-2.55
	ACSS2	acyl-CoA synthetase short-chain family member 2	1.5e-06	3.15e-05	-3.17
	DUSP27	dual specificity phosphatase 27 (putative)	1.5e-06	3.15e-05	-4.84
	LCN9	lipocalin 9	1.5e-06	3.15e-05	-5.25
	DNAH7	dynein, axonemal, heavy chain 7	1.5e-06	3.15e-05	-5.86
	NOTCH3	notch 3	1.6e-06	3.3e-05	4.16667
	IFI30	interferon, gamma-inducible protein 30	1.6e-06	3.3e-05	3.84615
	MKNK1	MAP kinase interacting serine/threonine kinase 1	1.6e-06	3.3e-05	3.84615
	DPY19L1	dpy-19-like 1 (C. elegans)	1.6e-06	3.3e-05	3.22581
	SLX4	SLX4 structure-specific endonuclease subunit homolog (S. cerevisiae)	1.6e-06	3.3e-05	3.125
	E2F3	E2F transcription factor 3	1.6e-06	3.3e-05	2.5
	C17orf46	chromosome 17 open reading frame 46	1.6e-06	3.3e-05	-2.41
	EIF3G	eukaryotic translation initiation factor 3, subunit G	1.6e-06	3.3e-05	-2.43
	UFM1	ubiquitin-fold modifier 1	1.6e-06	3.3e-05	-2.46
	GTF3A	general transcription factor IIIA	1.6e-06	3.3e-05	-2.51
	COPS3	COP9 constitutive photomorphogenic homolog subunit 3 (Arabidopsis)	1.6e-06	3.3e-05	-2.65
	SPHAR	S-phase response (cyclin related)	1.6e-06	3.3e-05	-3.07
	SERGEF	secretion regulating guanine nucleotide exchange factor	1.6e-06	3.3e-05	-3.11
	ARHGAP29	Rho GTPase activating protein 29	1.6e-06	3.3e-05	-5.7
	CYP39A1	cytochrome P450, family 39, subfamily A, polypeptide 1	1.6e-06	3.3e-05	-6.87
	AJUBA	ajuba LIM protein	1.7e-06	3.48e-05	8.33333
	GGT5	gamma-glutamyltransferase 5	1.7e-06	3.48e-05	4.34783
	PHKG2	phosphorylase kinase, gamma 2 (testis)	1.7e-06	3.48e-05	4.16667
	FLJ25694	uncharacterized protein FLJ25694	1.7e-06	3.48e-05	-3.07
	FAM118A	family with sequence similarity 118, member A	1.7e-06	3.48e-05	-3.07
	RNF130	ring finger protein 130	1.7e-06	3.48e-05	-3.11
	RILPL2	Rab interacting lysosomal protein-like 2	1.7e-06	3.48e-05	-3.21
	LOC158960	uncharacterized protein BC009467	1.7e-06	3.48e-05	-3.55
	LINC00319	long intergenic non-protein coding RNA 319	1.8e-06	3.64e-05	8.33333
	EFNB1	ephrin-B1	1.8e-06	3.64e-05	5
	EVC	Ellis van Creveld syndrome	1.8e-06	3.64e-05	3.7037
	FOXD2	forkhead box D2	1.8e-06	3.64e-05	3.7037
	HGSNAT	heparan-alpha-glucosaminide N-acetyltransferase	1.8e-06	3.64e-05	3.22581
	DYNC1H1	dynein, cytoplasmic 1, heavy chain 1	1.8e-06	3.64e-05	2.32558
	TAF5L	TAF5-like RNA polymerase II, p300/CBP-associated factor (PCAF)-associated factor, 65kDa	1.8e-06	3.64e-05	2.12766
	FAM156B	family with sequence similarity 156, member B	1.8e-06	3.64e-05	-2.78
	NET1	neuroepithelial cell transforming 1	1.8e-06	3.64e-05	-3.06
	RNASE13	ribonuclease, RNase A family, 13 (non-active)	1.8e-06	3.64e-05	-3.37
	KRTAP10-9	keratin associated protein 10-9	1.8e-06	3.64e-05	-4.16
	PIP	prolactin-induced protein	1.8e-06	3.64e-05	-4.44
	RASGEF1A	RasGEF domain family, member 1A	1.8e-06	3.64e-05	-5.25
	KIF2C	kinesin family member 2C	1.9e-06	3.82e-05	8.33333
	AURKA	aurora kinase A	1.9e-06	3.82e-05	5.88235
	PTBP3	polypyrimidine tract binding protein 3	1.9e-06	3.82e-05	2.32558
	LIPT1	lipoyltransferase 1	1.9e-06	3.82e-05	-2.87
	HBG1	hemoglobin, gamma A	1.9e-06	3.82e-05	-8.96
	LIFR	leukemia inhibitory factor receptor alpha	1.9e-06	3.82e-05	-10.17
	DSG3	desmoglein 3	2e-06	3.97e-05	58.8235
	CSTA	cystatin A (stefin A)	2e-06	3.97e-05	52.6316
	NHS	Nance-Horan syndrome (congenital cataracts and dental anomalies)	2e-06	3.97e-05	7.69231
	TUBB6	tubulin, beta 6 class V	2e-06	3.97e-05	3.44828
	SPECC1L	sperm antigen with calponin homology and coiled-coil domains 1-like	2e-06	3.97e-05	-2.24
	ZNF33B	zinc finger protein 33B	2e-06	3.97e-05	-2.86
	HIP1R	huntingtin interacting protein 1 related	2e-06	3.97e-05	-2.86
	COMMD10	COMM domain containing 10	2e-06	3.97e-05	-3.29
	WNK2	WNK lysine deficient protein kinase 2	2e-06	3.97e-05	-3.72
	NCF1	neutrophil cytosolic factor 1	2e-06	3.97e-05	-4.33
	FAM87A	family with sequence similarity 87, member A	2e-06	3.97e-05	-7.72
	C21orf37	chromosome 21 open reading frame 37	2e-06	3.97e-05	-8.86
	FGFR3	fibroblast growth factor receptor 3	2.1e-06	4.1e-05	7.69231
	INCENP	inner centromere protein antigens 135/155kDa	2.1e-06	4.1e-05	5.88235
	BMP7	bone morphogenetic protein 7	2.1e-06	4.1e-05	5.55556
	ADAD2	adenosine deaminase domain containing 2	2.1e-06	4.1e-05	5.26316
	LOC100130673	phosphoribosyl pyrophosphate synthetase 2 pseudogene	2.1e-06	4.1e-05	4.7619
	RFTN1	raftlin, lipid raft linker 1	2.1e-06	4.1e-05	4.54545
	FJX1	four jointed box 1 (Drosophila)	2.1e-06	4.1e-05	4
	ST3GAL3	ST3 beta-galactoside alpha-2,3-sialyltransferase 3	2.1e-06	4.1e-05	-2.36
	IFT20	intraflagellar transport 20 homolog (Chlamydomonas)	2.1e-06	4.1e-05	-2.84
	CCDC28A	coiled-coil domain containing 28A	2.1e-06	4.1e-05	-3.37
	LOC100129413	uncharacterized LOC100129413	2.1e-06	4.1e-05	-3.42
	MTMR6	myotubularin related protein 6	2.1e-06	4.1e-05	-3.54
	SLC37A2	solute carrier family 37 (glycerol-3-phosphate transporter), member 2	2.1e-06	4.1e-05	-3.68
	MXI1	MAX interactor 1	2.1e-06	4.1e-05	-3.79
	LCE1A	late cornified envelope 1A	2.1e-06	4.1e-05	-3.89
	TAP2	transporter 2, ATP-binding cassette, sub-family B (MDR/TAP)	2.2e-06	4.28e-05	5.88235
	CASP4	caspase 4, apoptosis-related cysteine peptidase	2.2e-06	4.28e-05	-2.71
	PPFIBP2	PTPRF interacting protein, binding protein 2 (liprin beta 2)	2.2e-06	4.28e-05	-3.18
	IZUMO4	IZUMO family member 4	2.2e-06	4.28e-05	-3.2
	C2CD2L	C2CD2-like	2.2e-06	4.28e-05	-3.6
	RAD51	RAD51 homolog (S. cerevisiae)	2.3e-06	4.44e-05	10.6383
	LOC91450	uncharacterized LOC91450	2.3e-06	4.44e-05	4.54545
	IARS	isoleucyl-tRNA synthetase	2.3e-06	4.44e-05	4.16667
	USP5	ubiquitin specific peptidase 5 (isopeptidase T)	2.3e-06	4.44e-05	4.16667
	KIAA1715	KIAA1715	2.3e-06	4.44e-05	3.57143
	GLE1	GLE1 RNA export mediator homolog (yeast)	2.3e-06	4.44e-05	3.44828
	HMGXB3	HMG box domain containing 3	2.3e-06	4.44e-05	2.77778
	BRI3	brain protein I3	2.3e-06	4.44e-05	-2.3
	IGFBP3	insulin-like growth factor binding protein 3	2.4e-06	4.59e-05	4
	TMEM43	transmembrane protein 43	2.4e-06	4.59e-05	2.32558
	GPHN	gephyrin	2.4e-06	4.59e-05	-3.05
	PYY2	peptide YY, 2 (seminalplasmin)	2.4e-06	4.59e-05	-3.32
	LOC643783	uncharacterized LOC643783	2.4e-06	4.59e-05	-3.48
	PHOSPHO2-KLHL23	PHOSPHO2-KLHL23 readthrough	2.4e-06	4.59e-05	-4.09
	FXYD2	FXYD domain containing ion transport regulator 2	2.4e-06	4.59e-05	-4.15
	NELL1	NEL-like 1 (chicken)	2.4e-06	4.59e-05	-5.38
	PLEKHA2	pleckstrin homology domain containing, family A (phosphoinositide binding specific) member 2	2.5e-06	4.75e-05	3.0303
	RAB35	RAB35, member RAS oncogene family	2.5e-06	4.75e-05	2.94118
	RILP	Rab interacting lysosomal protein	2.5e-06	4.75e-05	-2.72
	CALCOCO2	calcium binding and coiled-coil domain 2	2.5e-06	4.75e-05	-2.96
	PIK3R1	phosphoinositide-3-kinase, regulatory subunit 1 (alpha)	2.5e-06	4.75e-05	-3.75
	PDZD8	PDZ domain containing 8	2.5e-06	4.75e-05	-3.75
	C7orf41	chromosome 7 open reading frame 41	2.5e-06	4.75e-05	-3.96
	C19orf21	chromosome 19 open reading frame 21	2.6e-06	4.91e-05	16.129
	TGFB1	transforming growth factor, beta 1	2.6e-06	4.91e-05	7.69231
	SPINT1	serine peptidase inhibitor, Kunitz type 1	2.6e-06	4.91e-05	5.55556
	MINPP1	multiple inositol-polyphosphate phosphatase 1	2.6e-06	4.91e-05	2.7027
	TUBD1	tubulin, delta 1	2.6e-06	4.91e-05	-2.25
	RNF13	ring finger protein 13	2.6e-06	4.91e-05	-3.48
	PNPLA7	patatin-like phospholipase domain containing 7	2.6e-06	4.91e-05	-4.3
	LRRC26	leucine rich repeat containing 26	2.6e-06	4.91e-05	-4.88
	RAPGEFL1	Rap guanine nucleotide exchange factor (GEF)-like 1	2.7e-06	5.06e-05	10.6383
	KCTD15	potassium channel tetramerisation domain containing 15	2.7e-06	5.06e-05	4.16667
	LOC651337	uncharacterized LOC651337	2.7e-06	5.06e-05	-2.5
	EFCAB4A	EF-hand calcium binding domain 4A	2.7e-06	5.06e-05	-3.48
	LGALS12	lectin, galactoside-binding, soluble, 12	2.7e-06	5.06e-05	-4.54
	CTNNAL1	catenin (cadherin-associated protein), alpha-like 1	2.7e-06	5.06e-05	-4.55
	LUM	lumican	2.8e-06	5.22e-05	14.0845
	ZNF202	zinc finger protein 202	2.8e-06	5.22e-05	4.16667
	MTHFSD	methenyltetrahydrofolate synthetase domain containing	2.8e-06	5.22e-05	3.7037
	FAM164C	family with sequence similarity 164, member C	2.8e-06	5.22e-05	-2.77
	LINC00320	long intergenic non-protein coding RNA 320	2.8e-06	5.22e-05	-3.49
	LOC728537	uncharacterized LOC728537	2.8e-06	5.22e-05	-4.59
	F12	coagulation factor XII (Hageman factor)	2.9e-06	5.38e-05	10
	LOC100131792	uncharacterized LOC100131792	2.9e-06	5.38e-05	4.54545
	C1orf229	chromosome 1 open reading frame 229	2.9e-06	5.38e-05	-2.56
	C10orf53	chromosome 10 open reading frame 53	2.9e-06	5.38e-05	-3.28
	SNURF	SNRPN upstream reading frame	2.9e-06	5.38e-05	-3.87
	DACH1	dachshund homolog 1 (Drosophila)	2.9e-06	5.38e-05	-7.4
	GPC1	glypican 1	3e-06	5.52e-05	4.34783
	S100A3	S100 calcium binding protein A3	3e-06	5.52e-05	4
	SOCS6	suppressor of cytokine signaling 6	3e-06	5.52e-05	3.84615
	NUPL1	nucleoporin like 1	3e-06	5.52e-05	2.5
	LOC157381	uncharacterized LOC157381	3e-06	5.52e-05	-2.63
	LOC100128822	uncharacterized LOC100128822	3e-06	5.52e-05	-2.98
	PHF21B	PHD finger protein 21B	3e-06	5.52e-05	-3.48
	UBE2J1	ubiquitin-conjugating enzyme E2, J1, U	3e-06	5.52e-05	-4.14
	TM7SF2	transmembrane 7 superfamily member 2	3e-06	5.52e-05	-4.83
	WLS	wntless homolog (Drosophila)	3.1e-06	5.64e-05	3.84615
	TUBA1C	tubulin, alpha 1c	3.1e-06	5.64e-05	3.7037
	TMEM165	transmembrane protein 165	3.1e-06	5.64e-05	3.57143
	PLXNA1	plexin A1	3.1e-06	5.64e-05	3.33333
	ZDHHC18	zinc finger, DHHC-type containing 18	3.1e-06	5.64e-05	3.22581
	SH3TC1	SH3 domain and tetratricopeptide repeats 1	3.1e-06	5.64e-05	2.27273
	MORC4	MORC family CW-type zinc finger 4	3.1e-06	5.64e-05	-2.07
	LPIN1	lipin 1	3.1e-06	5.64e-05	-2.57
	SYT3	synaptotagmin III	3.1e-06	5.64e-05	-2.67
	XKRX	XK, Kell blood group complex subunit-related, X-linked	3.1e-06	5.64e-05	-4.14
	TTLL7	tubulin tyrosine ligase-like family, member 7	3.1e-06	5.64e-05	-4.69
	DKFZp434L192	uncharacterized protein DKFZp434L192	3.1e-06	5.64e-05	-4.98
	C7orf10	chromosome 7 open reading frame 10	3.2e-06	5.78e-05	6.25
	ANXA2P1	annexin A2 pseudogene 1	3.2e-06	5.78e-05	3.22581
	SNX29	sorting nexin 29	3.2e-06	5.78e-05	2.7027
	GPR142	G protein-coupled receptor 142	3.2e-06	5.78e-05	2.22222
	SAT2	spermidine/spermine N1-acetyltransferase family member 2	3.2e-06	5.78e-05	-2.83
	TBC1D24	TBC1 domain family, member 24	3.2e-06	5.78e-05	-4.44
	PAX9	paired box 9	3.2e-06	5.78e-05	-6.08
	SLC26A9	solute carrier family 26, member 9	3.2e-06	5.78e-05	-16.51
	LRP8	low density lipoprotein receptor-related protein 8, apolipoprotein e receptor	3.3e-06	5.92e-05	7.69231
	BIRC5	baculoviral IAP repeat containing 5	3.3e-06	5.92e-05	6.25
	C6orf26	chromosome 6 open reading frame 26	3.3e-06	5.92e-05	4.16667
	STAB1	stabilin 1	3.3e-06	5.92e-05	3.57143
	KIAA0317	KIAA0317	3.3e-06	5.92e-05	2.63158
	OPN3	opsin 3	3.3e-06	5.92e-05	2.5641
	MYNN	myoneurin	3.3e-06	5.92e-05	-2.25
	KRT16	keratin 16	3.4e-06	6.04e-05	7.14286
	NINJ2	ninjurin 2	3.4e-06	6.04e-05	6.66667
	ANGPT2	angiopoietin 2	3.4e-06	6.04e-05	6.25
	NHSL1	NHS-like 1	3.4e-06	6.04e-05	4.7619
	RANBP6	RAN binding protein 6	3.4e-06	6.04e-05	4.34783
	NRN1L	neuritin 1-like	3.4e-06	6.04e-05	3.57143
	OSBPL11	oxysterol binding protein-like 11	3.4e-06	6.04e-05	2.63158
	ICK	intestinal cell (MAK-like) kinase	3.4e-06	6.04e-05	-2.75
	PKP2	plakophilin 2	3.4e-06	6.04e-05	-8.27
	PROM2	prominin 2	3.5e-06	6.2e-05	4.7619
	SPATS2	spermatogenesis associated, serine-rich 2	3.5e-06	6.2e-05	-3.44
	LOC150197	uncharacterized LOC150197	3.5e-06	6.2e-05	-3.81
	SLC13A5	solute carrier family 13 (sodium-dependent citrate transporter), member 5	3.5e-06	6.2e-05	-20.14
	HIST1H2BJ	histone cluster 1, H2bj	3.6e-06	6.37e-05	4.34783
	ZNF490	zinc finger protein 490	3.6e-06	6.37e-05	3.57143
	SERPINB4	serpin peptidase inhibitor, clade B (ovalbumin), member 4	3.7e-06	6.51e-05	43.4783
	MINK1	misshapen-like kinase 1	3.7e-06	6.51e-05	4.34783
	CCNYL1	cyclin Y-like 1	3.7e-06	6.51e-05	4.16667
	MTHFD1L	methylenetetrahydrofolate dehydrogenase (NADP+ dependent) 1-like	3.7e-06	6.51e-05	3.0303
	CT47A11	cancer/testis antigen family 47, member A11	3.7e-06	6.51e-05	-2.27
	F2RL2	coagulation factor II (thrombin) receptor-like 2	3.8e-06	6.66e-05	11.9048
	SH3D21	SH3 domain containing 21	3.8e-06	6.66e-05	4.16667
	UBA2	ubiquitin-like modifier activating enzyme 2	3.8e-06	6.66e-05	-2.33
	MOCS2	molybdenum cofactor synthesis 2	3.8e-06	6.66e-05	-2.63
	ARHGEF37	Rho guanine nucleotide exchange factor (GEF) 37	3.8e-06	6.66e-05	-4.36
	STRA6	stimulated by retinoic acid gene 6 homolog (mouse)	3.9e-06	6.8e-05	4.34783
	ZNF524	zinc finger protein 524	3.9e-06	6.8e-05	-2.4
	TBC1D4	TBC1 domain family, member 4	3.9e-06	6.8e-05	-2.71
	PPP1R16A	protein phosphatase 1, regulatory subunit 16A	3.9e-06	6.8e-05	-3.03
	C11orf54	chromosome 11 open reading frame 54	3.9e-06	6.8e-05	-3.14
	SFTPB	surfactant protein B	3.9e-06	6.8e-05	-3.51
	LOC286109	uncharacterized LOC286109	4e-06	6.93e-05	5.55556
	C12orf53	chromosome 12 open reading frame 53	4e-06	6.93e-05	4.7619
	COL4A2	collagen, type IV, alpha 2	4e-06	6.93e-05	3.84615
	VAMP4	vesicle-associated membrane protein 4	4e-06	6.93e-05	-2.24
	LOC644277	uncharacterized LOC644277	4e-06	6.93e-05	-2.64
	AHDC1	AT hook, DNA binding motif, containing 1	4e-06	6.93e-05	-3.46
	HHLA3	HERV-H LTR-associating 3	4e-06	6.93e-05	-6.55
	SSH1	slingshot homolog 1 (Drosophila)	4.1e-06	7.08e-05	3.22581
	SNX27	sorting nexin family member 27	4.1e-06	7.08e-05	2.5
	FLJ44477	FLJ44477 protein	4.1e-06	7.08e-05	-2.46
	MRGPRG	MAS-related GPR, member G	4.1e-06	7.08e-05	-3.58
	S100A16	S100 calcium binding protein A16	4.2e-06	7.21e-05	4.34783
	EXT1	exostosin 1	4.2e-06	7.21e-05	3.33333
	HEATR3	HEAT repeat containing 3	4.2e-06	7.21e-05	2.77778
	PMS2P5	postmeiotic segregation increased 2 pseudogene 5	4.2e-06	7.21e-05	2.5641
	DNAJC1	DnaJ (Hsp40) homolog, subfamily C, member 1	4.2e-06	7.21e-05	-2.7
	SLC14A1	solute carrier family 14 (urea transporter), member 1 (Kidd blood group)	4.2e-06	7.21e-05	-2.95
	SPOCK1	sparc/osteonectin, cwcv and kazal-like domains proteoglycan (testican) 1	4.3e-06	7.36e-05	7.14286
	SLC31A1	solute carrier family 31 (copper transporters), member 1	4.3e-06	7.36e-05	-3.79
	POU2F3	POU class 2 homeobox 3	4.3e-06	7.36e-05	-6.24
	RACGAP1	Rac GTPase activating protein 1	4.4e-06	7.49e-05	5.55556
	MYOF	myoferlin	4.4e-06	7.49e-05	4.54545
	KIAA1967	KIAA1967	4.4e-06	7.49e-05	4.34783
	TMEM189	transmembrane protein 189	4.4e-06	7.49e-05	2.85714
	DCLRE1A	DNA cross-link repair 1A	4.4e-06	7.49e-05	-2.2
	MAOA	monoamine oxidase A	4.4e-06	7.49e-05	-5.55
	RAB7B	RAB7B, member RAS oncogene family	4.5e-06	7.61e-05	4.54545
	KIAA0195	KIAA0195	4.5e-06	7.61e-05	4.16667
	CLSTN3	calsyntenin 3	4.5e-06	7.61e-05	4
	GAK	cyclin G associated kinase	4.5e-06	7.61e-05	2.7027
	CLOCK	clock homolog (mouse)	4.5e-06	7.61e-05	2.63158
	TNFRSF1A	tumor necrosis factor receptor superfamily, member 1A	4.5e-06	7.61e-05	2.12766
	SPANXN4	SPANX family, member N4	4.5e-06	7.61e-05	-3.96
	SLC22A1	solute carrier family 22 (organic cation transporter), member 1	4.6e-06	7.74e-05	5
	ENO1	enolase 1, (alpha)	4.6e-06	7.74e-05	4.16667
	OBFC2A	oligonucleotide/oligosaccharide-binding fold containing 2A	4.6e-06	7.74e-05	4.16667
	TFR2	transferrin receptor 2	4.6e-06	7.74e-05	-2.41
	PDLIM2	PDZ and LIM domain 2 (mystique)	4.6e-06	7.74e-05	-3.62
	LOC100129447	uncharacterized LOC100129447	4.6e-06	7.74e-05	-4.24
	FKBP10	FK506 binding protein 10, 65 kDa	4.7e-06	7.88e-05	5.26316
	ECE1	endothelin converting enzyme 1	4.7e-06	7.88e-05	3.7037
	RPS6KA4	ribosomal protein S6 kinase, 90kDa, polypeptide 4	4.7e-06	7.88e-05	3.22581
	F10	coagulation factor X	4.7e-06	7.88e-05	-3.42
	CAPG	capping protein (actin filament), gelsolin-like	4.8e-06	8.03e-05	3.44828
	NPL	N-acetylneuraminate pyruvate lyase (dihydrodipicolinate synthase)	4.8e-06	8.03e-05	2.43902
	CHD4	chromodomain helicase DNA binding protein 4	4.8e-06	8.03e-05	2.22222
	LAMC2	laminin, gamma 2	4.9e-06	8.18e-05	3.7037
	FBXO25	F-box protein 25	4.9e-06	8.18e-05	-2.34
	NKX2-3	NK2 homeobox 3	4.9e-06	8.18e-05	-4.76
	PPFIA1	protein tyrosine phosphatase, receptor type, f polypeptide (PTPRF), interacting protein (liprin), alpha 1	5e-06	8.31e-05	5
	LOC157562	uncharacterized LOC157562	5e-06	8.31e-05	4
	FBXO9	F-box protein 9	5e-06	8.31e-05	-2.07
	LOC100132774	uncharacterized LOC100132774	5e-06	8.31e-05	-2.79
	TCEB3C	transcription elongation factor B polypeptide 3C (elongin A3)	5e-06	8.31e-05	-3.7
	BDKRB1	bradykinin receptor B1	5.1e-06	8.46e-05	7.14286
	GAL3ST1	galactose-3-O-sulfotransferase 1	5.1e-06	8.46e-05	-6.39
	PPP1R9A	protein phosphatase 1, regulatory subunit 9A	5.1e-06	8.46e-05	-12.6
	LOC401164	uncharacterized LOC401164	5.2e-06	8.6e-05	4.54545
	THRSP	thyroid hormone responsive	5.2e-06	8.6e-05	-3.18
	ALPI	alkaline phosphatase, intestinal	5.2e-06	8.6e-05	-3.75
	LOC729175	uncharacterized LOC729175	5.3e-06	8.72e-05	-2.82
	ETV2	ets variant 2	5.3e-06	8.72e-05	-2.96
	F8A2	coagulation factor VIII-associated 2	5.3e-06	8.72e-05	-3.41
	NR0B1	nuclear receptor subfamily 0, group B, member 1	5.3e-06	8.72e-05	-3.7
	EIF5	eukaryotic translation initiation factor 5	5.3e-06	8.72e-05	-3.88
	KLHL38	kelch-like 38 (Drosophila)	5.3e-06	8.72e-05	-4.52
	ZNF502	zinc finger protein 502	5.4e-06	8.88e-05	-3.3
	IGFBP2	insulin-like growth factor binding protein 2, 36kDa	5.5e-06	9e-05	6.66667
	HIST1H2BD	histone cluster 1, H2bd	5.5e-06	9e-05	5
	LOC100131043	uncharacterized LOC100131043	5.5e-06	9e-05	5
	NAB2	NGFI-A binding protein 2 (EGR1 binding protein 2)	5.5e-06	9e-05	3.33333
	CALR	calreticulin	5.5e-06	9e-05	2.43902
	CDV3	CDV3 homolog (mouse)	5.5e-06	9e-05	-5.44
	SLX1A	SLX1 structure-specific endonuclease subunit homolog A (S. cerevisiae)	5.6e-06	9.14e-05	3.33333
	NMD3	NMD3 homolog (S. cerevisiae)	5.6e-06	9.14e-05	-2.85
	ZP2	zona pellucida glycoprotein 2 (sperm receptor)	5.6e-06	9.14e-05	-5.16
	FOXL1	forkhead box L1	5.7e-06	9.27e-05	18.1818
	TMEM176B	transmembrane protein 176B	5.7e-06	9.27e-05	7.14286
	HMGB3	high mobility group box 3	5.7e-06	9.27e-05	5.26316
	UTP15	UTP15, U3 small nucleolar ribonucleoprotein, homolog (S. cerevisiae)	5.7e-06	9.27e-05	3.22581
	ZMAT3	zinc finger, matrin-type 3	5.8e-06	9.41e-05	5
	RBP7	retinol binding protein 7, cellular	5.8e-06	9.41e-05	-4.66
	FAM55A	family with sequence similarity 55, member A	5.8e-06	9.41e-05	-5.41
	PDGFRB	platelet-derived growth factor receptor, beta polypeptide	5.9e-06	9.54e-05	4.34783
	PHACTR2	phosphatase and actin regulator 2	5.9e-06	9.54e-05	2.77778
	ZNF438	zinc finger protein 438	5.9e-06	9.54e-05	-2.3
	IQCE	IQ motif containing E	5.9e-06	9.54e-05	-2.4
	PABPC4L	poly(A) binding protein, cytoplasmic 4-like	5.9e-06	9.54e-05	-4.05
	PRICKLE2	prickle homolog 2 (Drosophila)	6e-06	9.67e-05	6.25
	GLI3	GLI family zinc finger 3	6e-06	9.67e-05	2.94118
	SYBU	syntabulin (syntaxin-interacting)	6e-06	9.67e-05	-4.52
	NFE2L1	nuclear factor (erythroid-derived 2)-like 1	6.1e-06	9.82e-05	2.7027
	WNT10A	wingless-type MMTV integration site family, member 10A	6.1e-06	9.82e-05	-5.79
	BUB1B	budding uninhibited by benzimidazoles 1 homolog beta (yeast)	6.2e-06	9.94e-05	7.69231
	ABCB6	ATP-binding cassette, sub-family B (MDR/TAP), member 6	6.2e-06	9.94e-05	2.5
	ZNF33A	zinc finger protein 33A	6.2e-06	9.94e-05	-2.24
	RHOU	ras homolog gene family, member U	6.2e-06	9.94e-05	-3.9
	LOC643711	platelet-activating factor acetylhydrolase 1b, catalytic subunit 2 (30kDa) pseudogene	6.2e-06	9.94e-05	-4.46
	CYP2J2	cytochrome P450, family 2, subfamily J, polypeptide 2	6.3e-06	0.000101	8.33333
	CEP55	centrosomal protein 55kDa	6.3e-06	0.000101	5.88235
	GALK1	galactokinase 1	6.3e-06	0.000101	-2.7
	ANAPC16	anaphase promoting complex subunit 16	6.3e-06	0.000101	-3.84
	C5orf64	chromosome 5 open reading frame 64	6.3e-06	0.000101	-12.74
	CALML5	calmodulin-like 5	6.3e-06	0.000101	-20.34
	LOC100131015	uncharacterized LOC100131015	6.4e-06	0.000102	4.34783
	RBFOX2	RNA binding protein, fox-1 homolog (C. elegans) 2	6.4e-06	0.000102	2.94118
	NFATC2	nuclear factor of activated T-cells, cytoplasmic, calcineurin-dependent 2	6.4e-06	0.000102	-2.99
	EPRS	glutamyl-prolyl-tRNA synthetase	6.4e-06	0.000102	-3.38
	ASAP1-IT1	ASAP1 intronic transcript 1 (non-protein coding)	6.5e-06	0.000103	6.25
	CIR1	corepressor interacting with RBPJ, 1	6.5e-06	0.000103	-2.58
	LOC91149	uncharacterized LOC91149	6.5e-06	0.000103	-2.98
	LRRC39	leucine rich repeat containing 39	6.5e-06	0.000103	-3.62
	TAT	tyrosine aminotransferase	6.5e-06	0.000103	-3.89
	IRS1	insulin receptor substrate 1	6.6e-06	0.000104	7.14286
	ROR2	receptor tyrosine kinase-like orphan receptor 2	6.6e-06	0.000104	3.22581
	OR8G2	olfactory receptor, family 8, subfamily G, member 2	6.6e-06	0.000104	2.63158
	ACOX2	acyl-CoA oxidase 2, branched chain	6.6e-06	0.000104	-3.82
	BEX1	brain expressed, X-linked 1	6.6e-06	0.000104	-6.37
	DARS2	aspartyl-tRNA synthetase 2, mitochondrial	6.7e-06	0.000105	5.55556
	CTSA	cathepsin A	6.7e-06	0.000105	3.44828
	SLC17A3	solute carrier family 17 (sodium phosphate), member 3	6.7e-06	0.000105	3.44828
	ZSCAN12	zinc finger and SCAN domain containing 12	6.7e-06	0.000105	3.125
	INO80	INO80 homolog (S. cerevisiae)	6.7e-06	0.000105	2.63158
	C11orf52	chromosome 11 open reading frame 52	6.7e-06	0.000105	-4.66
	RERGL	RERG/RAS-like	6.7e-06	0.000105	-9.97
	SNAPC3	small nuclear RNA activating complex, polypeptide 3, 50kDa	6.8e-06	0.000106	2.43902
	EXOC6	exocyst complex component 6	6.8e-06	0.000106	-2.38
	FAM151A	family with sequence similarity 151, member A	6.8e-06	0.000106	-2.59
	C17orf28	chromosome 17 open reading frame 28	6.8e-06	0.000106	-3.21
	ARL3	ADP-ribosylation factor-like 3	6.9e-06	0.000108	3.7037
	KLHL25	kelch-like 25 (Drosophila)	6.9e-06	0.000108	2.94118
	LANCL3	LanC lantibiotic synthetase component C-like 3 (bacterial)	6.9e-06	0.000108	2.22222
	FGL1	fibrinogen-like 1	7e-06	0.000109	4
	MCM3	minichromosome maintenance complex component 3	7e-06	0.000109	3.125
	PRICKLE3	prickle homolog 3 (Drosophila)	7e-06	0.000109	-2.83
	GJB5	gap junction protein, beta 5, 31.1kDa	7.1e-06	0.00011	6.66667
	PMEPA1	prostate transmembrane protein, androgen induced 1	7.1e-06	0.00011	3.44828
	NFRKB	nuclear factor related to kappaB binding protein	7.1e-06	0.00011	3.22581
	TRMT5	TRM5 tRNA methyltransferase 5 homolog (S. cerevisiae)	7.1e-06	0.00011	-2.06
	COL7A1	collagen, type VII, alpha 1	7.2e-06	0.000111	7.69231
	OTUD3	OTU domain containing 3	7.2e-06	0.000111	4.7619
	SRP72	signal recognition particle 72kDa	7.2e-06	0.000111	-2.03
	LFNG	LFNG O-fucosylpeptide 3-beta-N-acetylglucosaminyltransferase	7.3e-06	0.000113	10
	CD79A	CD79a molecule, immunoglobulin-associated alpha	7.3e-06	0.000113	-4.79
	ZFYVE1	zinc finger, FYVE domain containing 1	7.4e-06	0.000114	2.17391
	LOC401357	uncharacterized LOC401357	7.4e-06	0.000114	-2.33
	ZNF843	zinc finger protein 843	7.4e-06	0.000114	-2.46
	LOC100130093	uncharacterized LOC100130093	7.4e-06	0.000114	-3.34
	PTGS1	prostaglandin-endoperoxide synthase 1 (prostaglandin G/H synthase and cyclooxygenase)	7.5e-06	0.000115	11.236
	WDR47	WD repeat domain 47	7.5e-06	0.000115	5.55556
	OGDH	oxoglutarate (alpha-ketoglutarate) dehydrogenase (lipoamide)	7.5e-06	0.000115	3.84615
	CCNJ	cyclin J	7.5e-06	0.000115	3.22581
	MAN2A2	mannosidase, alpha, class 2A, member 2	7.5e-06	0.000115	-2.95
	CCT6B	chaperonin containing TCP1, subunit 6B (zeta 2)	7.5e-06	0.000115	-4.24
	WIPF3	WAS/WASL interacting protein family, member 3	7.5e-06	0.000115	-5.18
	OR10A4	olfactory receptor, family 10, subfamily A, member 4	7.6e-06	0.000116	2.63158
	FBXW12	F-box and WD repeat domain containing 12	7.6e-06	0.000116	-2.96
	ATP1A3	ATPase, Na+/K+ transporting, alpha 3 polypeptide	7.6e-06	0.000116	-3.07
	OR2M7	olfactory receptor, family 2, subfamily M, member 7	7.6e-06	0.000116	-3.25
	BCORP1	BCL6 corepressor pseudogene 1	7.6e-06	0.000116	-3.31
	FLJ43681	ribosomal protein L23a pseudogene	7.7e-06	0.000117	-2.04
	GZMM	granzyme M (lymphocyte met-ase 1)	7.7e-06	0.000117	-2.6
	DTWD2	DTW domain containing 2	7.8e-06	0.000118	3.44828
	WHSC1	Wolf-Hirschhorn syndrome candidate 1	7.8e-06	0.000118	2.43902
	NDUFV3	NADH dehydrogenase (ubiquinone) flavoprotein 3, 10kDa	7.8e-06	0.000118	-2.03
	FERMT1	fermitin family member 1	7.9e-06	0.00012	5.26316
	PBX4	pre-B-cell leukemia homeobox 4	7.9e-06	0.00012	5
	C5orf65	chromosome 5 open reading frame 65	7.9e-06	0.00012	-3.57
	DTNA	dystrobrevin, alpha	7.9e-06	0.00012	-4.41
	AHNAK2	AHNAK nucleoprotein 2	8e-06	0.000121	7.14286
	TMEM158	transmembrane protein 158 (gene/pseudogene)	8.1e-06	0.000122	10
	GNB5	guanine nucleotide binding protein (G protein), beta 5	8.1e-06	0.000122	6.25
	KLHL5	kelch-like 5 (Drosophila)	8.1e-06	0.000122	5.26316
	CBX2	chromobox homolog 2	8.1e-06	0.000122	2.43902
	CASP5	caspase 5, apoptosis-related cysteine peptidase	8.1e-06	0.000122	-2.96
	ALAD	aminolevulinate dehydratase	8.1e-06	0.000122	-3.53
	C19orf59	chromosome 19 open reading frame 59	8.2e-06	0.000123	4.16667
	NACC1	nucleus accumbens associated 1, BEN and BTB (POZ) domain containing	8.2e-06	0.000123	4.16667
	LMBR1	limb region 1 homolog (mouse)	8.2e-06	0.000123	3.33333
	C6orf192	chromosome 6 open reading frame 192	8.2e-06	0.000123	2.43902
	LOC100130111	uncharacterized LOC100130111	8.2e-06	0.000123	-8.49
	B7H6	B7 homolog 6	8.3e-06	0.000124	4.7619
	LOC100129373	uncharacterized LOC100129373	8.3e-06	0.000124	2.85714
	EPB41L4A-AS1	EPB41L4A antisense RNA 1 (non-protein coding)	8.3e-06	0.000124	-2.58
	LOC100128019	uncharacterized LOC100128019	8.3e-06	0.000124	-3.89
	WBSCR27	Williams Beuren syndrome chromosome region 27	8.3e-06	0.000124	-4.78
	FGF13	fibroblast growth factor 13	8.3e-06	0.000124	-17.13
	CD68	CD68 molecule	8.4e-06	0.000125	3.7037
	PLCD3	phospholipase C, delta 3	8.4e-06	0.000125	3.57143
	CBL	Cas-Br-M (murine) ecotropic retroviral transforming sequence	8.4e-06	0.000125	3.125
	OAZ3	ornithine decarboxylase antizyme 3	8.4e-06	0.000125	-3.86
	ZNF793	zinc finger protein 793	8.5e-06	0.000126	6.25
	PMS2L2	postmeiotic segregation increased 2-like 2 pseudogene	8.5e-06	0.000126	2.5641
	PMP2	peripheral myelin protein 2	8.5e-06	0.000126	-3.95
	ST7-AS1	ST7 antisense RNA 1 (non-protein coding)	8.5e-06	0.000126	-4.04
	NR3C2	nuclear receptor subfamily 3, group C, member 2	8.5e-06	0.000126	-4.91
	MAGEL2	MAGE-like 2	8.6e-06	0.000127	6.66667
	FBLN1	fibulin 1	8.6e-06	0.000127	4.16667
	APOBEC3C	apolipoprotein B mRNA editing enzyme, catalytic polypeptide-like 3C	8.6e-06	0.000127	4
	PRO1768	PRO1768	8.6e-06	0.000127	-2.3
	PUS7	pseudouridylate synthase 7 homolog (S. cerevisiae)	8.7e-06	0.000129	3.22581
	FITM2	fat storage-inducing transmembrane protein 2	8.8e-06	0.00013	3.44828
	C14orf102	chromosome 14 open reading frame 102	8.8e-06	0.00013	2.77778
	ATP1B3	ATPase, Na+/K+ transporting, beta 3 polypeptide	9e-06	0.000133	3.84615
	GTPBP3	GTP binding protein 3 (mitochondrial)	9.1e-06	0.000134	4.54545
	ZNF496	zinc finger protein 496	9.1e-06	0.000134	-2.12
	ZC3H12A	zinc finger CCCH-type containing 12A	9.2e-06	0.000135	3.57143
	CLDN19	claudin 19	9.2e-06	0.000135	-2.26
	LOC283761	uncharacterized LOC283761	9.2e-06	0.000135	-5.8
	HLF	hepatic leukemia factor	9.2e-06	0.000135	-12.98
	LOC493754	RAB guanine nucleotide exchange factor (GEF) 1 pseudogene	9.3e-06	0.000136	-2.23
	FOXRED1	FAD-dependent oxidoreductase domain containing 1	9.4e-06	0.000137	4.34783
	LINC00263	long intergenic non-protein coding RNA 263	9.4e-06	0.000137	-2.81
	GCM1	glial cells missing homolog 1 (Drosophila)	9.4e-06	0.000137	-2.82
	FLJ30901	uncharacterized protein FLJ30901	9.4e-06	0.000137	-6.15
	SMAD9	SMAD family member 9	9.5e-06	0.000139	-4.18
	PHGDH	phosphoglycerate dehydrogenase	9.5e-06	0.000139	-4.37
	TNFRSF11A	tumor necrosis factor receptor superfamily, member 11a, NFKB activator	9.5e-06	0.000139	-6.12
	TTTY23	testis-specific transcript, Y-linked 23 (non-protein coding)	9.6e-06	0.00014	-3.46
	C7orf55	chromosome 7 open reading frame 55	9.7e-06	0.000141	-3.59
	C1orf74	chromosome 1 open reading frame 74	9.8e-06	0.000142	4.54545
	PPP6R2	protein phosphatase 6, regulatory subunit 2	9.8e-06	0.000142	2.08333
	LOC93432	maltase-glucoamylase (alpha-glucosidase) pseudogene	9.8e-06	0.000142	-7.07
	HEYL	hairy/enhancer-of-split related with YRPW motif-like	9.9e-06	0.000144	7.14286
	PRRG3	proline rich Gla (G-carboxyglutamic acid) 3 (transmembrane)	1e-05	0.000145	-3.14
	FGD6	FYVE, RhoGEF and PH domain containing 6	1.01e-05	0.000146	5
	COL8A2	collagen, type VIII, alpha 2	1.01e-05	0.000146	5
	DNM1	dynamin 1	1.01e-05	0.000146	3.125
	P4HA1	prolyl 4-hydroxylase, alpha polypeptide I	1.02e-05	0.000147	3.44828
	RAMP1	receptor (G protein-coupled) activity modifying protein 1	1.03e-05	0.000148	11.3636
	FOXM1	forkhead box M1	1.03e-05	0.000148	8.33333
	HNRNPAB	heterogeneous nuclear ribonucleoprotein A/B	1.03e-05	0.000148	2.77778
	LINC00221	long intergenic non-protein coding RNA 221	1.03e-05	0.000148	-2.26
	KIF2B	kinesin family member 2B	1.04e-05	0.00015	-2.83
	GADD45G	growth arrest and DNA-damage-inducible, gamma	1.04e-05	0.00015	-2.84
	PLA2R1	phospholipase A2 receptor 1, 180kDa	1.04e-05	0.00015	-4.21
	CDC45	cell division cycle 45 homolog (S. cerevisiae)	1.05e-05	0.000151	5.26316
	UPP1	uridine phosphorylase 1	1.06e-05	0.000152	4.34783
	C14orf176	chromosome 14 open reading frame 176	1.06e-05	0.000152	-2.77
	FAM20A	family with sequence similarity 20, member A	1.06e-05	0.000152	-3.28
	GMIP	GEM interacting protein	1.07e-05	0.000153	2.38095
	PHF17	PHD finger protein 17	1.07e-05	0.000153	-3.25
	ASB9	ankyrin repeat and SOCS box containing 9	1.08e-05	0.000154	6.25
	DPYSL4	dihydropyrimidinase-like 4	1.08e-05	0.000154	-2.21
	MNAT1	menage a trois homolog 1, cyclin H assembly factor (Xenopus laevis)	1.08e-05	0.000154	-2.51
	ZNF609	zinc finger protein 609	1.09e-05	0.000155	2.5
	ZNF286B	zinc finger protein 286B	1.09e-05	0.000155	2.43902
	C8orf40	chromosome 8 open reading frame 40	1.09e-05	0.000155	-2.91
	SYN1	synapsin I	1.09e-05	0.000155	-3.57
	PPAPDC1A	phosphatidic acid phosphatase type 2 domain containing 1A	1.1e-05	0.000156	15.3846
	GAPT	GRB2-binding adaptor protein, transmembrane	1.1e-05	0.000156	7.14286
	CILP2	cartilage intermediate layer protein 2	1.1e-05	0.000156	5.88235
	DIAPH3	diaphanous homolog 3 (Drosophila)	1.1e-05	0.000156	4.16667
	SMC4	structural maintenance of chromosomes 4	1.1e-05	0.000156	3.33333
	MCM9	minichromosome maintenance complex component 9	1.1e-05	0.000156	2.5641
	HERC2	hect domain and RLD 2	1.1e-05	0.000156	2.5
	POLR2I	polymerase (RNA) II (DNA directed) polypeptide I, 14.5kDa	1.1e-05	0.000156	-2.02
	LOC440356	uncharacterized LOC440356	1.1e-05	0.000156	-3.67
	PSPC1	paraspeckle component 1	1.11e-05	0.000157	2.5641
	LRRC45	leucine rich repeat containing 45	1.12e-05	0.000158	-2.62
	RHBG	Rh family, B glycoprotein (gene/pseudogene)	1.13e-05	0.000159	8.33333
	RRAGD	Ras-related GTP binding D	1.13e-05	0.000159	-7.98
	CACNG3	calcium channel, voltage-dependent, gamma subunit 3	1.14e-05	0.00016	-2.71
	GPR84	G protein-coupled receptor 84	1.14e-05	0.00016	-4.94
	C6	complement component 6	1.14e-05	0.00016	-5.24
	C9orf167	chromosome 9 open reading frame 167	1.15e-05	0.000161	3.84615
	HR	hairless homolog (mouse)	1.15e-05	0.000161	-2.93
	CACNB2	calcium channel, voltage-dependent, beta 2 subunit	1.15e-05	0.000161	-4.48
	SKP2	S-phase kinase-associated protein 2 (p45)	1.16e-05	0.000163	4.16667
	GNRH2	gonadotropin-releasing hormone 2	1.16e-05	0.000163	2.22222
	UCHL1	ubiquitin carboxyl-terminal esterase L1 (ubiquitin thiolesterase)	1.17e-05	0.000164	10.6383
	USP44	ubiquitin specific peptidase 44	1.17e-05	0.000164	-4.03
	SH3RF2	SH3 domain containing ring finger 2	1.17e-05	0.000164	-4.76
	CDCA2	cell division cycle associated 2	1.18e-05	0.000165	8.33333
	CCNA2	cyclin A2	1.19e-05	0.000165	6.66667
	TAS2R13	taste receptor, type 2, member 13	1.19e-05	0.000165	4.54545
	MAN1B1	mannosidase, alpha, class 1B, member 1	1.18e-05	0.000165	2.17391
	HINT2	histidine triad nucleotide binding protein 2	1.18e-05	0.000165	-2.26
	TOMM20	translocase of outer mitochondrial membrane 20 homolog (yeast)	1.19e-05	0.000165	-2.42
	CCNG1	cyclin G1	1.19e-05	0.000165	-2.43
	CLEC10A	C-type lectin domain family 10, member A	1.19e-05	0.000165	-5.3
	CDK6	cyclin-dependent kinase 6	1.2e-05	0.000167	3.22581
	LOC100128640	uncharacterized LOC100128640	1.2e-05	0.000167	-3.78
	LOC100132831	A20-binding inhibitor of NF-kappaB activation 2 pseudogene	1.21e-05	0.000168	3.44828
	ZFAND1	zinc finger, AN1-type domain 1	1.21e-05	0.000168	-3.27
	LOC151300	uncharacterized LOC151300	1.22e-05	0.000169	-2.35
	ACTR5	ARP5 actin-related protein 5 homolog (yeast)	1.23e-05	0.00017	3.44828
	CLCN2	chloride channel 2	1.23e-05	0.00017	3.22581
	CCNL1	cyclin L1	1.23e-05	0.00017	-2.65
	DZANK1	double zinc ribbon and ankyrin repeat domains 1	1.25e-05	0.000172	4.54545
	EPG5	ectopic P-granules autophagy protein 5 homolog (C. elegans)	1.25e-05	0.000172	2.43902
	BEX5	brain expressed, X-linked 5	1.26e-05	0.000174	-10.29
	DTX2P1-UPK3BP1-PMS2P11	DTX2P1-UPK3BP1-PMS2P11 readthrough (non-protein coding)	1.27e-05	0.000175	2.7027
	PLA2G15	phospholipase A2, group XV	1.27e-05	0.000175	2.27273
	DFFA	DNA fragmentation factor, 45kDa, alpha polypeptide	1.27e-05	0.000175	-2.72
	PRRT1	proline-rich transmembrane protein 1	1.27e-05	0.000175	-3.45
	SNORA23	small nucleolar RNA, H/ACA box 23	1.27e-05	0.000175	-4.34
	CCDC103	coiled-coil domain containing 103	1.29e-05	0.000177	-3.04
	FAM189A2	family with sequence similarity 189, member A2	1.29e-05	0.000177	-3.36
	TCEA3	transcription elongation factor A (SII), 3	1.29e-05	0.000177	-3.54
	GPN3	GPN-loop GTPase 3	1.3e-05	0.000178	-2.63
	MEX3A	mex-3 homolog A (C. elegans)	1.31e-05	0.000179	4.34783
	BICD2	bicaudal D homolog 2 (Drosophila)	1.32e-05	0.00018	5.26316
	RIN3	Ras and Rab interactor 3	1.32e-05	0.00018	3.7037
	C9orf53	chromosome 9 open reading frame 53	1.33e-05	0.000181	-8.58
	ASPM	asp (abnormal spindle) homolog, microcephaly associated (Drosophila)	1.34e-05	0.000183	8.33333
	GALP	galanin-like peptide	1.35e-05	0.000184	-3.79
	GMFB	glia maturation factor, beta	1.36e-05	0.000185	2.27273
	SPP1	secreted phosphoprotein 1	1.37e-05	0.000186	10.8696
	CLDN16	claudin 16	1.38e-05	0.000187	4
	USP32	ubiquitin specific peptidase 32	1.38e-05	0.000187	2.38095
	ANKRD43	ankyrin repeat domain 43	1.38e-05	0.000187	-2.63
	CDK3	cyclin-dependent kinase 3	1.38e-05	0.000187	-3.21
	IFITM4P	interferon induced transmembrane protein 4 pseudogene	1.39e-05	0.000188	2.85714
	MPST	mercaptopyruvate sulfurtransferase	1.39e-05	0.000188	-2.74
	NOS3	nitric oxide synthase 3 (endothelial cell)	1.39e-05	0.000188	-3.51
	HULC	highly up-regulated in liver cancer (non-protein coding)	1.4e-05	0.000189	4.7619
	PRLHR	prolactin releasing hormone receptor	1.4e-05	0.000189	-2.07
	LIME1	Lck interacting transmembrane adaptor 1	1.4e-05	0.000189	-4.41
	JUN	jun proto-oncogene	1.4e-05	0.000189	-6.78
	LOC643441	uncharacterized LOC643441	1.42e-05	0.000191	-4.43
	NSUN7	NOP2/Sun domain family, member 7	1.42e-05	0.000191	-5.05
	RNF40	ring finger protein 40	1.43e-05	0.000193	3.125
	ST6GALNAC1	ST6 (alpha-N-acetyl-neuraminyl-2,3-beta-galactosyl-1,3)-N-acetylgalactosaminide alpha-2,6-sialyltransferase 1	1.44e-05	0.000194	25.641
	RAB26	RAB26, member RAS oncogene family	1.44e-05	0.000194	-6.85
	ACSM5	acyl-CoA synthetase medium-chain family member 5	1.46e-05	0.000196	-2.48
	PPP1R14A	protein phosphatase 1, regulatory (inhibitor) subunit 14A	1.47e-05	0.000197	-2.89
	SPEF2	sperm flagellar 2	1.47e-05	0.000197	-3.12
	IFITM3	interferon induced transmembrane protein 3	1.49e-05	0.0002	3.0303
	P2RY6	pyrimidinergic receptor P2Y, G-protein coupled, 6	1.5e-05	0.000201	4.16667
	CHERP	calcium homeostasis endoplasmic reticulum protein	1.5e-05	0.000201	3.7037
	EDNRA	endothelin receptor type A	1.51e-05	0.000202	3.33333
	TSPAN3	tetraspanin 3	1.51e-05	0.000202	3.0303
	PIGT	phosphatidylinositol glycan anchor biosynthesis, class T	1.51e-05	0.000202	2.77778
	PGPEP1	pyroglutamyl-peptidase I	1.51e-05	0.000202	-2.46
	MCEE	methylmalonyl CoA epimerase	1.51e-05	0.000202	-2.65
	MSN	moesin	1.53e-05	0.000203	2.63158
	TET2	tet methylcytosine dioxygenase 2	1.53e-05	0.000203	2.63158
	ARPC2	actin related protein 2/3 complex, subunit 2, 34kDa	1.53e-05	0.000203	2.17391
	AQP12A	aquaporin 12A	1.52e-05	0.000203	-4.51
	TIMP4	TIMP metallopeptidase inhibitor 4	1.53e-05	0.000203	-6.64
	IGFBP4	insulin-like growth factor binding protein 4	1.55e-05	0.000206	4.7619
	TUBB1	tubulin, beta 1 class VI	1.55e-05	0.000206	-3.77
	PCYT2	phosphate cytidylyltransferase 2, ethanolamine	1.56e-05	0.000207	-2.16
	LOC644852	uncharacterized LOC644852	1.56e-05	0.000207	-3.34
	LINC00256A	long intergenic non-protein coding RNA 256A	1.57e-05	0.000208	-4.09
	SIGLEC15	sialic acid binding Ig-like lectin 15	1.58e-05	0.000209	-2.66
	KREMEN1	kringle containing transmembrane protein 1	1.59e-05	0.00021	-2.75
	GPR25	G protein-coupled receptor 25	1.6e-05	0.000211	-2.35
	C6orf25	chromosome 6 open reading frame 25	1.6e-05	0.000211	-2.43
	LINC00115	long intergenic non-protein coding RNA 115	1.61e-05	0.000212	5
	KIAA0284	KIAA0284	1.61e-05	0.000212	2.85714
	SLC6A5	solute carrier family 6 (neurotransmitter transporter, glycine), member 5	1.61e-05	0.000212	2.22222
	CCDC9	coiled-coil domain containing 9	1.62e-05	0.000213	2.38095
	CYP2A13	cytochrome P450, family 2, subfamily A, polypeptide 13	1.62e-05	0.000213	-2.63
	RNU105B	RNA, U105B small nucleolar	1.62e-05	0.000213	-6.08
	RP1L1	retinitis pigmentosa 1-like 1	1.63e-05	0.000214	-2.52
	POLI	polymerase (DNA directed) iota	1.63e-05	0.000214	-2.9
	LOC648740	actin, gamma 2, smooth muscle, enteric pseudogene	1.63e-05	0.000214	-4.51
	RRN3	RRN3 RNA polymerase I transcription factor homolog (S. cerevisiae)	1.64e-05	0.000215	2.5641
	SURF6	surfeit 6	1.65e-05	0.000216	4.16667
	STK39	serine threonine kinase 39	1.66e-05	0.000217	-3.53
	ACTL6B	actin-like 6B	1.67e-05	0.000218	-2.25
	ZP1	zona pellucida glycoprotein 1 (sperm receptor)	1.67e-05	0.000218	-3.36
	LYPD6B	LY6/PLAUR domain containing 6B	1.67e-05	0.000218	-7.82
	AGFG1	ArfGAP with FG repeats 1	1.68e-05	0.000219	2.38095
	FAM171A2	family with sequence similarity 171, member A2	1.68e-05	0.000219	-2.8
	OTUD6A	OTU domain containing 6A	1.68e-05	0.000219	-3.16
	SLC19A2	solute carrier family 19 (thiamine transporter), member 2	1.69e-05	0.00022	-3.7
	ULBP2	UL16 binding protein 2	1.7e-05	0.000221	7.69231
	NGEF	neuronal guanine nucleotide exchange factor	1.7e-05	0.000221	2.94118
	TMC8	transmembrane channel-like 8	1.7e-05	0.000221	2.43902
	GXYLT1	glucoside xylosyltransferase 1	1.7e-05	0.000221	-2.02
	TSPAN6	tetraspanin 6	1.71e-05	0.000222	-4.85
	IFI6	interferon, alpha-inducible protein 6	1.72e-05	0.000223	5.26316
	LOC652119	double homeobox protein 4-like protein 4-like	1.72e-05	0.000223	3.84615
	AGER	advanced glycosylation end product-specific receptor	1.72e-05	0.000223	-2.14
	PLEKHG1	pleckstrin homology domain containing, family G (with RhoGef domain) member 1	1.73e-05	0.000224	4.16667
	FGF11	fibroblast growth factor 11	1.74e-05	0.000225	5.26316
	KCTD5	potassium channel tetramerisation domain containing 5	1.74e-05	0.000225	2.63158
	CYB5D2	cytochrome b5 domain containing 2	1.74e-05	0.000225	-2.42
	ZNRF1	zinc and ring finger 1	1.75e-05	0.000226	3.22581
	MYLK2	myosin light chain kinase 2	1.75e-05	0.000226	-4.13
	C8A	complement component 8, alpha polypeptide	1.78e-05	0.000229	5
	SEMA4G	sema domain, immunoglobulin domain (Ig), transmembrane domain (TM) and short cytoplasmic domain, (semaphorin) 4G	1.78e-05	0.000229	-2.28
	EN2	engrailed homeobox 2	1.78e-05	0.000229	-2.81
	SERPINB8	serpin peptidase inhibitor, clade B (ovalbumin), member 8	1.79e-05	0.00023	4.16667
	PLAUR	plasminogen activator, urokinase receptor	1.79e-05	0.00023	3.57143
	GPRC5B	G protein-coupled receptor, family C, group 5, member B	1.8e-05	0.000231	-6.44
	EARS2	glutamyl-tRNA synthetase 2, mitochondrial (putative)	1.81e-05	0.000232	5.26316
	RTEL1	regulator of telomere elongation helicase 1	1.81e-05	0.000232	2.63158
	MTHFR	methylenetetrahydrofolate reductase (NAD(P)H)	1.84e-05	0.000235	2.85714
	LOC100129104	uncharacterized LOC100129104	1.84e-05	0.000235	-2.57
	LOC285191	uncharacterized LOC285191	1.84e-05	0.000235	-2.8
	PSMA1	proteasome (prosome, macropain) subunit, alpha type, 1	1.86e-05	0.000237	3.44828
	STK38	serine/threonine kinase 38	1.86e-05	0.000237	2.94118
	CENPM	centromere protein M	1.86e-05	0.000237	2.7027
	ETFB	electron-transfer-flavoprotein, beta polypeptide	1.86e-05	0.000237	-2.21
	TSEN54	tRNA splicing endonuclease 54 homolog (S. cerevisiae)	1.86e-05	0.000237	-2.44
	USO1	USO1 vesicle docking protein homolog (yeast)	1.86e-05	0.000237	-2.8
	CRYM	crystallin, mu	1.86e-05	0.000237	-10.12
	LACTB	lactamase, beta	1.89e-05	0.00024	4
	CPVL	carboxypeptidase, vitellogenic-like	1.9e-05	0.000241	5.26316
	C18orf34	chromosome 18 open reading frame 34	1.9e-05	0.000241	-2.48
	LRRC15	leucine rich repeat containing 15	1.91e-05	0.000242	17.2414
	KCNC2	potassium voltage-gated channel, Shaw-related subfamily, member 2	1.92e-05	0.000243	-2.15
	PCNT	pericentrin	1.93e-05	0.000245	3.0303
	CTSE	cathepsin E	1.95e-05	0.000246	3.57143
	ITPR3	inositol 1,4,5-trisphosphate receptor, type 3	1.95e-05	0.000246	2.77778
	WIPF2	WAS/WASL interacting protein family, member 2	1.94e-05	0.000246	2.04082
	MAGEB17	melanoma antigen family B, 17	1.95e-05	0.000246	-2.91
	AIDA	axin interactor, dorsalization associated	1.95e-05	0.000246	-3.77
	GOLGA7	golgin A7	1.96e-05	0.000247	-2.17
	TNFRSF10A	tumor necrosis factor receptor superfamily, member 10a	1.97e-05	0.000248	3.33333
	ARMCX5	armadillo repeat containing, X-linked 5	1.97e-05	0.000248	-2.16
	THRB	thyroid hormone receptor, beta	1.99e-05	0.00025	-2.8
	LOC157627	uncharacterized LOC157627	1.99e-05	0.00025	-5.02
	EMB	embigin	2.01e-05	0.000252	5
	ABI3	ABI family, member 3	2.01e-05	0.000252	2.63158
	A2LD1	AIG2-like domain 1	2.01e-05	0.000252	-3.09
	SNX25	sorting nexin 25	2.02e-05	0.000254	2.38095
	ANKRD52	ankyrin repeat domain 52	2.04e-05	0.000256	2.43902
	GSDMA	gasdermin A	2.05e-05	0.000257	3.22581
	CTDSPL	CTD (carboxy-terminal domain, RNA polymerase II, polypeptide A) small phosphatase-like	2.06e-05	0.000258	-3.04
	PRM2	protamine 2	2.06e-05	0.000258	-3.3
	IL17B	interleukin 17B	2.06e-05	0.000258	-5.14
	UCA1	urothelial cancer associated 1 (non-protein coding)	2.07e-05	0.000259	9.09091
	PPP2R3C	protein phosphatase 2, regulatory subunit B'', gamma	2.08e-05	0.00026	-2.62
	RHOBTB3	Rho-related BTB domain containing 3	2.08e-05	0.00026	-4.29
	GTF3C1	general transcription factor IIIC, polypeptide 1, alpha 220kDa	2.09e-05	0.000261	3.0303
	SNAR-C3	small ILF3/NF90-associated RNA C3	2.09e-05	0.000261	-3.65
	GM2A	GM2 ganglioside activator	2.11e-05	0.000263	3.22581
	RPL13AP17	ribosomal protein L13a pseudogene 17	2.11e-05	0.000263	-3.35
	GAS6	growth arrest-specific 6	2.12e-05	0.000264	4.34783
	SEC61B	Sec61 beta subunit	2.13e-05	0.000265	-2.03
	MED7	mediator complex subunit 7	2.13e-05	0.000265	-2.15
	HIC1	hypermethylated in cancer 1	2.13e-05	0.000265	-5.24
	LCLAT1	lysocardiolipin acyltransferase 1	2.15e-05	0.000267	3.0303
	TP53	tumor protein p53	2.16e-05	0.000268	2.43902
	HEG1	HEG homolog 1 (zebrafish)	2.17e-05	0.000269	5.88235
	SIPA1L2	signal-induced proliferation-associated 1 like 2	2.17e-05	0.000269	3.84615
	C10orf2	chromosome 10 open reading frame 2	2.17e-05	0.000269	3.7037
	HDDC2	HD domain containing 2	2.17e-05	0.000269	-2.52
	HOXB13-AS1	HOXB13 antisense RNA 1 (non-protein coding)	2.18e-05	0.00027	-2.73
	CAPZA1	capping protein (actin filament) muscle Z-line, alpha 1	2.19e-05	0.000271	2.63158
	NIPAL4	NIPA-like domain containing 4	2.22e-05	0.000274	12.987
	SLC24A6	solute carrier family 24 (sodium/potassium/calcium exchanger), member 6	2.22e-05	0.000274	2.17391
	SHISA8	shisa homolog 8 (Xenopus laevis)	2.23e-05	0.000275	-2.36
	CRLF2	cytokine receptor-like factor 2	2.23e-05	0.000275	-2.55
	RAD23A	RAD23 homolog A (S. cerevisiae)	2.25e-05	0.000277	-3.01
	LCN15	lipocalin 15	2.26e-05	0.000278	2.85714
	STAT3	signal transducer and activator of transcription 3 (acute-phase response factor)	2.27e-05	0.000279	2.32558
	ADH1C	alcohol dehydrogenase 1C (class I), gamma polypeptide	2.28e-05	0.00028	-12.98
	ALDH9A1	aldehyde dehydrogenase 9 family, member A1	2.29e-05	0.000281	-2.69
	ASPN	asporin	2.3e-05	0.000282	10
	ARID5A	AT rich interactive domain 5A (MRF1-like)	2.3e-05	0.000282	-2.66
	C17orf107	chromosome 17 open reading frame 107	2.3e-05	0.000282	-3.07
	ASB18	ankyrin repeat and SOCS box containing 18	2.31e-05	0.000283	-3
	SAMD13	sterile alpha motif domain containing 13	2.31e-05	0.000283	-7.9
	SLC2A6	solute carrier family 2 (facilitated glucose transporter), member 6	2.32e-05	0.000284	2.43902
	SLC10A3	solute carrier family 10 (sodium/bile acid cotransporter family), member 3	2.32e-05	0.000284	2.27273
	SMG1	smg-1 homolog, phosphatidylinositol 3-kinase-related kinase (C. elegans)	2.33e-05	0.000285	2.12766
	GRN	granulin	2.34e-05	0.000286	2.94118
	OR51G1	olfactory receptor, family 51, subfamily G, member 1	2.34e-05	0.000286	2.5641
	TEX264	testis expressed 264	2.34e-05	0.000286	-2.5
	DKFZp686O1327	uncharacterized LOC401014	2.35e-05	0.000287	2.32558
	LOC401980	4933406M09Rik pseudogene	2.36e-05	0.000288	-3.79
	MAP7D1	MAP7 domain containing 1	2.37e-05	0.000289	2.32558
	ANXA8L2	annexin A8-like 2	2.38e-05	0.00029	7.14286
	RPP40	ribonuclease P/MRP 40kDa subunit	2.39e-05	0.00029	2.85714
	PSKH2	protein serine kinase H2	2.39e-05	0.00029	-2.86
	XK	X-linked Kx blood group (McLeod syndrome)	2.39e-05	0.00029	-9.12
	XKR4	XK, Kell blood group complex subunit-related family, member 4	2.4e-05	0.000291	-4.3
	C12orf29	chromosome 12 open reading frame 29	2.42e-05	0.000293	-3.39
	GNAI1	guanine nucleotide binding protein (G protein), alpha inhibiting activity polypeptide 1	2.45e-05	0.000297	5
	S100A6	S100 calcium binding protein A6	2.46e-05	0.000298	3.7037
	CHDH	choline dehydrogenase	2.46e-05	0.000298	-3.08
	STAT6	signal transducer and activator of transcription 6, interleukin-4 induced	2.47e-05	0.000299	4
	TRIM65	tripartite motif containing 65	2.47e-05	0.000299	2.08333
	FZD2	frizzled family receptor 2	2.49e-05	0.000301	4.54545
	CYP2G1P	cytochrome P450, family 2, subfamily G, polypeptide 1 pseudogene	2.49e-05	0.000301	2.43902
	HOMER1	homer homolog 1 (Drosophila)	2.55e-05	0.000307	3.7037
	LOC286052	uncharacterized LOC286052	2.55e-05	0.000307	-2.43
	LOC729852	uncharacterized LOC729852	2.54e-05	0.000307	-3.14
	CSNK1A1	casein kinase 1, alpha 1	2.56e-05	0.000308	2.63158
	MAD2L1	MAD2 mitotic arrest deficient-like 1 (yeast)	2.59e-05	0.000311	4.7619
	RAB9A	RAB9A, member RAS oncogene family	2.6e-05	0.000312	-2.42
	PRSS21	protease, serine, 21 (testisin)	2.6e-05	0.000312	-3.71
	HSPG2	heparan sulfate proteoglycan 2	2.61e-05	0.000313	3.0303
	LOC100124692	maltase-glucoamylase (alpha-glucosidase) pseudogene	2.61e-05	0.000313	-4.13
	NDC80	NDC80 homolog, kinetochore complex component (S. cerevisiae)	2.62e-05	0.000314	9.09091
	GGNBP1	gametogenetin binding protein 1	2.62e-05	0.000314	-4.27
	HES2	hairy and enhancer of split 2 (Drosophila)	2.64e-05	0.000316	4.16667
	FLJ37644	uncharacterized LOC400618	2.64e-05	0.000316	-3.42
	OR10J3	olfactory receptor, family 10, subfamily J, member 3	2.66e-05	0.000318	2.27273
	GPR132	G protein-coupled receptor 132	2.67e-05	0.000319	-2.6
	STRA13	stimulated by retinoic acid 13 homolog (mouse)	2.67e-05	0.000319	-2.6
	MFAP2	microfibrillar-associated protein 2	2.68e-05	0.00032	5
	PLCH2	phospholipase C, eta 2	2.68e-05	0.00032	-2.48
	FLJ14107	uncharacterized LOC80094	2.69e-05	0.000321	-2.47
	ABLIM2	actin binding LIM protein family, member 2	2.71e-05	0.000322	3.33333
	GYS1	glycogen synthase 1 (muscle)	2.71e-05	0.000322	2.22222
	GPR75	G protein-coupled receptor 75	2.7e-05	0.000322	-2.68
	MXRA5	matrix-remodelling associated 5	2.72e-05	0.000323	3.33333
	CENPC1	centromere protein C 1	2.74e-05	0.000325	-3.13
	LECT1	leukocyte cell derived chemotaxin 1	2.74e-05	0.000325	-5.85
	RNASEH2B	ribonuclease H2, subunit B	2.75e-05	0.000326	-2.26
	USP14	ubiquitin specific peptidase 14 (tRNA-guanine transglycosylase)	2.76e-05	0.000327	3.57143
	ITPRIPL2	inositol 1,4,5-trisphosphate receptor interacting protein-like 2	2.79e-05	0.000329	2.7027
	PYCARD	PYD and CARD domain containing	2.78e-05	0.000329	2.5
	OR4A15	olfactory receptor, family 4, subfamily A, member 15	2.79e-05	0.000329	-2.32
	GADD45B	growth arrest and DNA-damage-inducible, beta	2.79e-05	0.000329	-6.01
	GABRE	gamma-aminobutyric acid (GABA) A receptor, epsilon	2.8e-05	0.00033	5
	UCHL5	ubiquitin carboxyl-terminal hydrolase L5	2.8e-05	0.00033	-2.1
	PTGIR	prostaglandin I2 (prostacyclin) receptor (IP)	2.81e-05	0.000331	2.43902
	LOC100132966	uncharacterized LOC100132966	2.81e-05	0.000331	-2.29
	IKZF4	IKAROS family zinc finger 4 (Eos)	2.83e-05	0.000333	2.32558
	USH2A	Usher syndrome 2A (autosomal recessive, mild)	2.83e-05	0.000333	-2.34
	DDX24	DEAD (Asp-Glu-Ala-Asp) box polypeptide 24	2.84e-05	0.000334	4.34783
	PDE1C	phosphodiesterase 1C, calmodulin-dependent 70kDa	2.84e-05	0.000334	-3.05
	OVOS	ovostatin	2.85e-05	0.000335	-4.09
	FAM102A	family with sequence similarity 102, member A	2.86e-05	0.000336	2.94118
	TGIF2LY	TGFB-induced factor homeobox 2-like, Y-linked	2.88e-05	0.000338	-2.74
	HSPB3	heat shock 27kDa protein 3	2.9e-05	0.000339	21.7391
	DUS2L	dihydrouridine synthase 2-like, SMM1 homolog (S. cerevisiae)	2.9e-05	0.000339	3.57143
	CKAP4	cytoskeleton-associated protein 4	2.9e-05	0.000339	3.33333
	EPS15	epidermal growth factor receptor pathway substrate 15	2.9e-05	0.000339	-2.04
	PDHA1	pyruvate dehydrogenase (lipoamide) alpha 1	2.89e-05	0.000339	-2.31
	PLEKHB2	pleckstrin homology domain containing, family B (evectins) member 2	2.91e-05	0.00034	3.0303
	LOC100288292	putative uncharacterized protein FLJ44672-like	2.91e-05	0.00034	-3.36
	MACROD1	MACRO domain containing 1	2.92e-05	0.000341	-2.19
	PABPC5-AS1	PABPC5 antisense RNA 1 (non-protein coding)	2.93e-05	0.000342	-2.92
	TRAF3IP1	TNF receptor-associated factor 3 interacting protein 1	2.94e-05	0.000343	2.32558
	RAD51B	RAD51 homolog B (S. cerevisiae)	2.94e-05	0.000343	-2.58
	C4orf32	chromosome 4 open reading frame 32	2.95e-05	0.000343	-3.39
	PPP2R3B-AS1	PPP2R3B antisense RNA 1 (non-protein coding)	2.96e-05	0.000344	4.16667
	SHC1	SHC (Src homology 2 domain containing) transforming protein 1	2.96e-05	0.000344	2.38095
	LINC00340	long intergenic non-protein coding RNA 340	2.97e-05	0.000345	6.25
	NWD1	NACHT and WD repeat domain containing 1	2.97e-05	0.000345	5
	KCNV1	potassium channel, subfamily V, member 1	2.98e-05	0.000346	-2.33
	IFRD1	interferon-related developmental regulator 1	2.98e-05	0.000346	-2.37
	YIF1B	Yip1 interacting factor homolog B (S. cerevisiae)	3e-05	0.000348	2.5
	REEP5	receptor accessory protein 5	3.01e-05	0.000349	-2.36
	FONG	uncharacterized LOC348751	3.02e-05	0.00035	-5.61
	CTTN	cortactin	3.04e-05	0.000352	2.32558
	HARS2	histidyl-tRNA synthetase 2, mitochondrial (putative)	3.04e-05	0.000352	2.32558
	CGNL1	cingulin-like 1	3.06e-05	0.000354	-5.35
	WDR66	WD repeat domain 66	3.07e-05	0.000355	6.66667
	LEPROT	leptin receptor overlapping transcript	3.08e-05	0.000355	2.5
	LPL	lipoprotein lipase	3.08e-05	0.000355	-12.69
	TEAD1	TEA domain family member 1 (SV40 transcriptional enhancer factor)	3.13e-05	0.00036	2.32558
	CCRL1	chemokine (C-C motif) receptor-like 1	3.13e-05	0.00036	-9.63
	METTL8	methyltransferase like 8	3.14e-05	0.000361	2.7027
	CCDC27	coiled-coil domain containing 27	3.15e-05	0.000362	-3.35
	C5orf49	chromosome 5 open reading frame 49	3.16e-05	0.000363	3.7037
	CCDC132	coiled-coil domain containing 132	3.17e-05	0.000364	3.0303
	KIAA1656	KIAA1656 protein	3.22e-05	0.00037	-3.38
	MICAL3	microtubule associated monoxygenase, calponin and LIM domain containing 3	3.24e-05	0.000371	2.63158
	ZNF844	zinc finger protein 844	3.24e-05	0.000371	-2.75
	CNTNAP3	contactin associated protein-like 3	3.25e-05	0.000372	4.54545
	C10orf95	chromosome 10 open reading frame 95	3.26e-05	0.000372	4.54545
	BCMO1	beta-carotene 15,15'-monooxygenase 1	3.25e-05	0.000372	3.84615
	SLC22A18AS	solute carrier family 22 (organic cation transporter), member 18 antisense	3.25e-05	0.000372	3.125
	FAM74A1	family with sequence similarity 74, member A1	3.25e-05	0.000372	2.94118
	DIXDC1	DIX domain containing 1	3.26e-05	0.000372	-3.5
	KRTAP19-5	keratin associated protein 19-5	3.27e-05	0.000373	2.63158
	CCR10	chemokine (C-C motif) receptor 10	3.27e-05	0.000373	-2.83
	MTG1	mitochondrial GTPase 1 homolog (S. cerevisiae)	3.28e-05	0.000374	2.5641
	H2AFY	H2A histone family, member Y	3.28e-05	0.000374	2.17391
	PPP2R3A	protein phosphatase 2, regulatory subunit B'', alpha	3.29e-05	0.000375	-2.61
	PIP5K1B	phosphatidylinositol-4-phosphate 5-kinase, type I, beta	3.29e-05	0.000375	-5.11
	GFOD1	glucose-fructose oxidoreductase domain containing 1	3.31e-05	0.000376	3.57143
	RAP1GAP	RAP1 GTPase activating protein	3.31e-05	0.000376	-3.48
	FAM111A	family with sequence similarity 111, member A	3.32e-05	0.000377	2.85714
	CENPE	centromere protein E, 312kDa	3.34e-05	0.000379	3.7037
	GPR172A	G protein-coupled receptor 172A	3.34e-05	0.000379	2.27273
	GH1	growth hormone 1	3.34e-05	0.000379	-3.07
	CHST15	carbohydrate (N-acetylgalactosamine 4-sulfate 6-O) sulfotransferase 15	3.35e-05	0.00038	2.85714
	CDNF	cerebral dopamine neurotrophic factor	3.35e-05	0.00038	-4.69
	HS6ST2	heparan sulfate 6-O-sulfotransferase 2	3.37e-05	0.000381	6.25
	TEP1	telomerase-associated protein 1	3.36e-05	0.000381	2.94118
	KCTD19	potassium channel tetramerisation domain containing 19	3.37e-05	0.000381	-2.3
	PLEKHN1	pleckstrin homology domain containing, family N member 1	3.38e-05	0.000382	4.54545
	RDM1	RAD52 motif 1	3.4e-05	0.000384	3.7037
	HIST1H2BM	histone cluster 1, H2bm	3.41e-05	0.000385	3.84615
	TNFAIP1	tumor necrosis factor, alpha-induced protein 1 (endothelial)	3.42e-05	0.000385	2.22222
	DEFB113	defensin, beta 113	3.42e-05	0.000385	-3.29
	TMEM150C	transmembrane protein 150C	3.41e-05	0.000385	-4.3
	TMEM173	transmembrane protein 173	3.43e-05	0.000386	2.32558
	BPIFA2	BPI fold containing family A, member 2	3.45e-05	0.000388	-3.21
	TANC2	tetratricopeptide repeat, ankyrin repeat and coiled-coil containing 2	3.47e-05	0.000389	5.26316
	GANC	glucosidase, alpha; neutral C	3.47e-05	0.000389	2.32558
	QSER1	glutamine and serine rich 1	3.47e-05	0.000389	-2.1
	TFDP2	transcription factor Dp-2 (E2F dimerization partner 2)	3.47e-05	0.000389	-2.35
	H19	H19, imprinted maternally expressed transcript (non-protein coding)	3.48e-05	0.00039	10.5263
	KAT8	K(lysine) acetyltransferase 8	3.49e-05	0.000391	-2
	TMEM206	transmembrane protein 206	3.5e-05	0.000392	5.55556
	LAPTM4B	lysosomal protein transmembrane 4 beta	3.51e-05	0.000393	4
	SPATS2L	spermatogenesis associated, serine-rich 2-like	3.53e-05	0.000395	-2.33
	HIST2H2AA4	histone cluster 2, H2aa4	3.56e-05	0.000398	7.14286
	FOLR4	folate receptor 4 (delta) homolog (mouse)	3.57e-05	0.000399	3.22581
	CHIA	chitinase, acidic	3.61e-05	0.000402	-2.76
	FAM48B1	family with sequence similarity 48, member B1	3.6e-05	0.000402	-3.2
	IRX4	iroquois homeobox 4	3.62e-05	0.000403	14.2857
	PTPRH	protein tyrosine phosphatase, receptor type, H	3.62e-05	0.000403	5
	MYH11	myosin, heavy chain 11, smooth muscle	3.62e-05	0.000403	-10
	ZCWPW2	zinc finger, CW type with PWWP domain 2	3.63e-05	0.000404	-4.47
	EXOC6B	exocyst complex component 6B	3.64e-05	0.000405	2.63158
	FAM180B	family with sequence similarity 180, member B	3.67e-05	0.000407	-2.18
	LOC649294	uncharacterized LOC649294	3.67e-05	0.000407	-2.22
	C3orf45	chromosome 3 open reading frame 45	3.67e-05	0.000407	-2.87
	TWIST2	twist homolog 2 (Drosophila)	3.68e-05	0.000408	5.55556
	ZNF823	zinc finger protein 823	3.68e-05	0.000408	-3.8
	ZYX	zyxin	3.71e-05	0.000411	2.7027
	SULF2	sulfatase 2	3.73e-05	0.000412	4.54545
	GAPDH	glyceraldehyde-3-phosphate dehydrogenase	3.73e-05	0.000412	2.63158
	NPC1L1	NPC1 (Niemann-Pick disease, type C1, gene)-like 1	3.73e-05	0.000412	-2.33
	NME4	non-metastatic cells 4, protein expressed in	3.73e-05	0.000412	-2.37
	C14orf37	chromosome 14 open reading frame 37	3.75e-05	0.000414	5
	LOC727993	uncharacterized LOC727993	3.75e-05	0.000414	-2.79
	GIT2	G protein-coupled receptor kinase interacting ArfGAP 2	3.78e-05	0.000417	2.12766
	SMC6	structural maintenance of chromosomes 6	3.79e-05	0.000418	2.5641
	ZNF211	zinc finger protein 211	3.83e-05	0.000422	5.88235
	SPRY3	sprouty homolog 3 (Drosophila)	3.84e-05	0.000423	-3
	FANK1	fibronectin type III and ankyrin repeat domains 1	3.88e-05	0.000427	3.0303
	ERBB4	v-erb-a erythroblastic leukemia viral oncogene homolog 4 (avian)	3.88e-05	0.000427	-4.73
	DLEU2L	deleted in lymphocytic leukemia 2-like	3.94e-05	0.000433	2.7027
	HPS4	Hermansky-Pudlak syndrome 4	3.94e-05	0.000433	2.32558
	HINT3	histidine triad nucleotide binding protein 3	3.95e-05	0.000434	-2.07
	C1orf220	chromosome 1 open reading frame 220	3.96e-05	0.000435	4.54545
	NOP16	NOP16 nucleolar protein homolog (yeast)	3.97e-05	0.000436	2.94118
	SH3YL1	SH3 domain containing, Ysc84-like 1 (S. cerevisiae)	3.97e-05	0.000436	-3
	PIGG	phosphatidylinositol glycan anchor biosynthesis, class G	4.02e-05	0.00044	2.08333
	REREP3	arginine-glutamic acid dipeptide (RE) repeats pseudogene 3	4.01e-05	0.00044	-2.68
	GCAT	glycine C-acetyltransferase	4.02e-05	0.00044	-3.03
	PPP1R13L	protein phosphatase 1, regulatory subunit 13 like	4.04e-05	0.000441	3.57143
	LOC100130015	5-hydroxyisourate hydrolase pseudogene	4.03e-05	0.000441	-2.51
	NFIC	nuclear factor I/C (CCAAT-binding transcription factor)	4.04e-05	0.000441	-2.58
	CPEB3	cytoplasmic polyadenylation element binding protein 3	4.04e-05	0.000441	-2.83
	SLC7A7	solute carrier family 7 (amino acid transporter light chain, y+L system), member 7	4.07e-05	0.000444	5.55556
	ENPP4	ectonucleotide pyrophosphatase/phosphodiesterase 4 (putative)	4.09e-05	0.000446	-4.96
	STEAP1	six transmembrane epithelial antigen of the prostate 1	4.15e-05	0.000451	9.09091
	LCE3C	late cornified envelope 3C	4.14e-05	0.000451	3.57143
	SRCAP	Snf2-related CREBBP activator protein	4.17e-05	0.000453	2.85714
	SLC25A48	solute carrier family 25, member 48	4.17e-05	0.000453	-2.92
	CFTR	cystic fibrosis transmembrane conductance regulator (ATP-binding cassette sub-family C, member 7)	4.19e-05	0.000455	-6
	NRG1	neuregulin 1	4.2e-05	0.000456	5.55556
	ADNP2	ADNP homeobox 2	4.23e-05	0.000459	2.94118
	NRIP3	nuclear receptor interacting protein 3	4.28e-05	0.000463	2.27273
	ZNF8	zinc finger protein 8	4.28e-05	0.000463	2.04082
	LOC646576	uncharacterized LOC646576	4.28e-05	0.000463	-2.71
	LOC441698	ras-related protein Rap-2c-like	4.27e-05	0.000463	-2.93
	SLC22A9	solute carrier family 22 (organic anion transporter), member 9	4.3e-05	0.000465	-3.06
	CKAP2	cytoskeleton associated protein 2	4.31e-05	0.000466	3.0303
	SEMA4F	sema domain, immunoglobulin domain (Ig), transmembrane domain (TM) and short cytoplasmic domain, (semaphorin) 4F	4.32e-05	0.000466	2.7027
	CSN1S1	casein alpha s1	4.31e-05	0.000466	-5.18
	FAM188B	family with sequence similarity 188, member B	4.34e-05	0.000468	-2.07
	SPRED1	sprouty-related, EVH1 domain containing 1	4.37e-05	0.000471	5.55556
	CPN1	carboxypeptidase N, polypeptide 1	4.39e-05	0.000473	2.17391
	INPP5J	inositol polyphosphate-5-phosphatase J	4.39e-05	0.000473	-2.58
	PYCR2	pyrroline-5-carboxylate reductase family, member 2	4.41e-05	0.000475	-2.3
	PIAS2	protein inhibitor of activated STAT, 2	4.42e-05	0.000476	-2.09
	SLC46A3	solute carrier family 46, member 3	4.44e-05	0.000477	5.88235
	ZBTB39	zinc finger and BTB domain containing 39	4.44e-05	0.000477	2.63158
	FHL1	four and a half LIM domains 1	4.47e-05	0.00048	-2.03
	FAM206A	family with sequence similarity 206, member A	4.47e-05	0.00048	-2.18
	ZWILCH	Zwilch, kinetochore associated, homolog (Drosophila)	4.5e-05	0.000482	4.54545
	ADIPOQ	adiponectin, C1Q and collagen domain containing	4.5e-05	0.000482	-3.91
	UCP2	uncoupling protein 2 (mitochondrial, proton carrier)	4.52e-05	0.000484	5.88235
	PLD1	phospholipase D1, phosphatidylcholine-specific	4.53e-05	0.000484	4.7619
	PHLDB1	pleckstrin homology-like domain, family B, member 1	4.53e-05	0.000484	2.5
	C1orf87	chromosome 1 open reading frame 87	4.55e-05	0.000486	-4.41
	COL5A2	collagen, type V, alpha 2	4.56e-05	0.000487	11.236
	SLC13A3	solute carrier family 13 (sodium-dependent dicarboxylate transporter), member 3	4.58e-05	0.000489	-2.84
	FAM155A	family with sequence similarity 155, member A	4.59e-05	0.00049	8.33333
	USP20	ubiquitin specific peptidase 20	4.61e-05	0.000491	-2.58
	YWHAG	tyrosine 3-monooxygenase/tryptophan 5-monooxygenase activation protein, gamma polypeptide	4.62e-05	0.000492	2.27273
	GLIS2	GLIS family zinc finger 2	4.64e-05	0.000493	4.34783
	AP1S3	adaptor-related protein complex 1, sigma 3 subunit	4.64e-05	0.000493	3.84615
	CAPRIN2	caprin family member 2	4.63e-05	0.000493	2.7027
	ARFGAP3	ADP-ribosylation factor GTPase activating protein 3	4.64e-05	0.000493	-2.53
	XRCC6BP1	XRCC6 binding protein 1	4.64e-05	0.000493	-2.84
	CGRRF1	cell growth regulator with ring finger domain 1	4.65e-05	0.000494	-2.63
	UNQ9370	IFMQ9370	4.68e-05	0.000496	3.125
	PDK4	pyruvate dehydrogenase kinase, isozyme 4	4.67e-05	0.000496	-14.27
	BACH1	BTB and CNC homology 1, basic leucine zipper transcription factor 1	4.69e-05	0.000497	-2.42
	HIST1H2BI	histone cluster 1, H2bi	4.73e-05	0.000501	3.84615
	CDK10	cyclin-dependent kinase 10	4.74e-05	0.000501	2.85714
	FANCD2	Fanconi anemia, complementation group D2	4.73e-05	0.000501	2.43902
	CCL3	chemokine (C-C motif) ligand 3	4.73e-05	0.000501	-5.68
	C1QTNF5	C1q and tumor necrosis factor related protein 5	4.75e-05	0.000502	3.33333
	GPR98	G protein-coupled receptor 98	4.77e-05	0.000504	7.14286
	CCDC129	coiled-coil domain containing 129	4.8e-05	0.000506	-3.18
	LOC339988	uncharacterized LOC339988	4.81e-05	0.000507	-3.47
	LOC440335	uncharacterized LOC440335	4.85e-05	0.000511	-6.17
	PGPEP1L	pyroglutamyl-peptidase I-like	4.91e-05	0.000517	3.0303
	INTS7	integrator complex subunit 7	4.93e-05	0.000519	4.16667
	OR6C75	olfactory receptor, family 6, subfamily C, member 75	4.94e-05	0.00052	-2.19
	C11orf2	chromosome 11 open reading frame 2	4.96e-05	0.000521	-2
	ALAS1	aminolevulinate, delta-, synthase 1	4.96e-05	0.000521	-2.25
	ASPSCR1	alveolar soft part sarcoma chromosome region, candidate 1	4.96e-05	0.000521	-2.45
	YPEL4	yippee-like 4 (Drosophila)	4.97e-05	0.000521	-3.13
	TOR1AIP2	torsin A interacting protein 2	4.98e-05	0.000522	2.43902
	PYCR1	pyrroline-5-carboxylate reductase 1	5e-05	0.000524	-3.35
	HSP90AA5P	heat shock protein 90kDa alpha (cytosolic), class A member 5, pseudogene	5.01e-05	0.000525	-2.62
	PKHD1L1	polycystic kidney and hepatic disease 1 (autosomal recessive)-like 1	5.04e-05	0.000528	-5.05
	DUOX2	dual oxidase 2	5.07e-05	0.00053	16.3934
	TRERF1	transcriptional regulating factor 1	5.09e-05	0.000532	3.7037
	MGC45922	uncharacterized LOC284365	5.09e-05	0.000532	-2.93
	HPN	hepsin	5.1e-05	0.000533	-6.52
	FER	fer (fps/fes related) tyrosine kinase	5.13e-05	0.000536	3.84615
	SNORA74A	small nucleolar RNA, H/ACA box 74A	5.14e-05	0.000536	-5.91
	VPS26A	vacuolar protein sorting 26 homolog A (S. pombe)	5.16e-05	0.000538	-2.45
	FAM197Y2P	family with sequence similarity 197, Y-linked, member 2, pseudogene	5.16e-05	0.000538	-5.95
	MRVI1-AS1	MRVI1 antisense RNA 1 (non-protein coding)	5.23e-05	0.000545	-5.08
	IBTK	inhibitor of Bruton agammaglobulinemia tyrosine kinase	5.24e-05	0.000546	-2.66
	GINS2	GINS complex subunit 2 (Psf2 homolog)	5.27e-05	0.000549	7.14286
	EFHD2	EF-hand domain family, member D2	5.3e-05	0.00055	2.5641
	RAPGEF1	Rap guanine nucleotide exchange factor (GEF) 1	5.29e-05	0.00055	2.27273
	SLC26A11	solute carrier family 26, member 11	5.29e-05	0.00055	-2.26
	SPATA3	spermatogenesis associated 3	5.29e-05	0.00055	-3.87
	COL6A3	collagen, type VI, alpha 3	5.33e-05	0.000553	4.54545
	FAM135A	family with sequence similarity 135, member A	5.36e-05	0.000556	4
	SARM1	sterile alpha and TIR motif containing 1	5.36e-05	0.000556	-2.16
	AFAP1L1	actin filament associated protein 1-like 1	5.41e-05	0.00056	3.7037
	ACTB	actin, beta	5.4e-05	0.00056	2.5641
	ANKRD54	ankyrin repeat domain 54	5.41e-05	0.00056	-2.31
	BPIFA4P	BPI fold containing family A, member 4, pseudogene	5.44e-05	0.000562	4.16667
	MAP3K5	mitogen-activated protein kinase kinase kinase 5	5.43e-05	0.000562	2.63158
	POLR2A	polymerase (RNA) II (DNA directed) polypeptide A, 220kDa	5.44e-05	0.000562	2.27273
	THBS2	thrombospondin 2	5.45e-05	0.000563	2.94118
	RGS2	regulator of G-protein signaling 2, 24kDa	5.45e-05	0.000563	-5.19
	CD84	CD84 molecule	5.47e-05	0.000565	4.16667
	CFL1	cofilin 1 (non-muscle)	5.49e-05	0.000566	2.77778
	TNFSF13B	tumor necrosis factor (ligand) superfamily, member 13b	5.49e-05	0.000566	-3.58
	LOC100131174	uncharacterized LOC100131174	5.52e-05	0.000569	-2.5
	KLK2	kallikrein-related peptidase 2	5.52e-05	0.000569	-3.11
	S100A2	S100 calcium binding protein A2	5.58e-05	0.000574	6.66667
	RPL24	ribosomal protein L24	5.58e-05	0.000574	-2.01
	TSPAN10	tetraspanin 10	5.61e-05	0.000577	-2.04
	KLF7	Kruppel-like factor 7 (ubiquitous)	5.67e-05	0.000582	3.22581
	ENDOV	endonuclease V	5.66e-05	0.000582	-2.02
	PTK7	PTK7 protein tyrosine kinase 7	5.68e-05	0.000583	-4.13
	LOC100506105	uncharacterized LOC100506105	5.71e-05	0.000585	-3.5
	FAM71D	family with sequence similarity 71, member D	5.75e-05	0.000589	-3.17
	FBLN2	fibulin 2	5.79e-05	0.000593	2.94118
	S100P	S100 calcium binding protein P	5.84e-05	0.000597	17.5439
	JRKL	jerky homolog-like (mouse)	5.84e-05	0.000597	3.0303
	NLRP5	NLR family, pyrin domain containing 5	5.84e-05	0.000597	2.5
	BBOX1	butyrobetaine (gamma), 2-oxoglutarate dioxygenase (gamma-butyrobetaine hydroxylase) 1	5.85e-05	0.000598	11.3636
	ZBTB47	zinc finger and BTB domain containing 47	5.9e-05	0.000602	-2.7
	GAA	glucosidase, alpha; acid	5.92e-05	0.000604	2.7027
	C16orf82	chromosome 16 open reading frame 82	5.92e-05	0.000604	-3.56
	PRKX	protein kinase, X-linked	5.99e-05	0.00061	3.57143
	SWT1	SWT1 RNA endoribonuclease homolog (S. cerevisiae)	5.99e-05	0.00061	-3.65
	BDP1	B double prime 1, subunit of RNA polymerase III transcription initiation factor IIIB	6.03e-05	0.000613	2.63158
	UCMA	upper zone of growth plate and cartilage matrix associated	6.03e-05	0.000613	2.5
	RPS19BP1	ribosomal protein S19 binding protein 1	6.03e-05	0.000613	-2.06
	RND1	Rho family GTPase 1	6.02e-05	0.000613	-2.65
	IL2	interleukin 2	6.05e-05	0.000614	-2.27
	LOC100270746	uncharacterized LOC100270746	6.07e-05	0.000615	3.33333
	PPIEL	peptidylprolyl isomerase E-like pseudogene	6.07e-05	0.000615	3.0303
	FIZ1	FLT3-interacting zinc finger 1	6.07e-05	0.000615	2.63158
	OR1J4	olfactory receptor, family 1, subfamily J, member 4	6.08e-05	0.000616	-2.08
	LY6G6D	lymphocyte antigen 6 complex, locus G6D	6.08e-05	0.000616	-3.18
	E2F4	E2F transcription factor 4, p107/p130-binding	6.1e-05	0.000617	3.22581
	EIF2C2	eukaryotic translation initiation factor 2C, 2	6.12e-05	0.000619	2.43902
	DNAJC8	DnaJ (Hsp40) homolog, subfamily C, member 8	6.12e-05	0.000619	-2.08
	LOC100134663	uncharacterized LOC100134663	6.16e-05	0.000622	-2.85
	ZNF3	zinc finger protein 3	6.19e-05	0.000625	2.22222
	LOC200609	uncharacterized LOC200609	6.21e-05	0.000626	3.44828
	DKFZP686I15217	uncharacterized LOC401232	6.2e-05	0.000626	-2.86
	TMC6	transmembrane channel-like 6	6.23e-05	0.000627	2.17391
	ANKRD49	ankyrin repeat domain 49	6.22e-05	0.000627	-2.27
	GLRA4	glycine receptor, alpha 4	6.22e-05	0.000627	-2.59
	LOC100130057	uncharacterized LOC100130057	6.27e-05	0.000631	2.94118
	OGFOD1	2-oxoglutarate and iron-dependent oxygenase domain containing 1	6.27e-05	0.000631	2
	ANO8	anoctamin 8	6.32e-05	0.000635	2.85714
	CREB3	cAMP responsive element binding protein 3	6.31e-05	0.000635	-2.21
	ZNF668	zinc finger protein 668	6.33e-05	0.000636	2.17391
	GSTP1	glutathione S-transferase pi 1	6.35e-05	0.000637	3.84615
	PRRX2	paired related homeobox 2	6.35e-05	0.000637	3.84615
	ODF4	outer dense fiber of sperm tails 4	6.39e-05	0.000641	3.0303
	PFKFB2	6-phosphofructo-2-kinase/fructose-2,6-biphosphatase 2	6.4e-05	0.000642	2.38095
	ZNF273	zinc finger protein 273	6.45e-05	0.000646	2.27273
	PAPSS2	3'-phosphoadenosine 5'-phosphosulfate synthase 2	6.5e-05	0.000651	7.14286
	OAS3	2'-5'-oligoadenylate synthetase 3, 100kDa	6.51e-05	0.000651	2.7027
	SEPT9	septin 9	6.54e-05	0.000654	2.94118
	MIR205HG	MIR205 host gene (non-protein coding)	6.57e-05	0.000656	3.33333
	LOC100506036	uncharacterized LOC100506036	6.57e-05	0.000656	-3.07
	PTPRB	protein tyrosine phosphatase, receptor type, B	6.62e-05	0.00066	4.34783
	TBXAS1	thromboxane A synthase 1 (platelet)	6.61e-05	0.00066	-3.25
	C2orf54	chromosome 2 open reading frame 54	6.65e-05	0.000662	8.33333
	PLP1	proteolipid protein 1	6.68e-05	0.000665	-5.11
	OR2M2	olfactory receptor, family 2, subfamily M, member 2	6.7e-05	0.000666	2.22222
	CDKN2AIPNL	CDKN2A interacting protein N-terminal like	6.7e-05	0.000666	-2.94
	ACSBG2	acyl-CoA synthetase bubblegum family member 2	6.72e-05	0.000668	-2.52
	DVL3	dishevelled, dsh homolog 3 (Drosophila)	6.82e-05	0.000677	2.63158
	ZNF436	zinc finger protein 436	6.81e-05	0.000677	2.12766
	MMP9	matrix metallopeptidase 9 (gelatinase B, 92kDa gelatinase, 92kDa type IV collagenase)	6.84e-05	0.000678	9.09091
	SRD5A1	steroid-5-alpha-reductase, alpha polypeptide 1 (3-oxo-5 alpha-steroid delta 4-dehydrogenase alpha 1)	6.83e-05	0.000678	4.34783
	SMURF1	SMAD specific E3 ubiquitin protein ligase 1	6.84e-05	0.000678	2.43902
	NBPF1	neuroblastoma breakpoint family, member 1	6.86e-05	0.000679	2.32558
	HMHB1	histocompatibility (minor) HB-1	6.86e-05	0.000679	-2.66
	DDX26B	DEAD/H (Asp-Glu-Ala-Asp/His) box polypeptide 26B	6.86e-05	0.000679	-2.78
	LOC100132363	uncharacterized LOC100132363	6.86e-05	0.000679	-2.87
	NCAPH	non-SMC condensin I complex, subunit H	6.87e-05	0.00068	3.57143
	DCBLD2	discoidin, CUB and LCCL domain containing 2	6.92e-05	0.000684	5.88235
	LDHA	lactate dehydrogenase A	6.93e-05	0.000685	3.33333
	SLC30A2	solute carrier family 30 (zinc transporter), member 2	6.96e-05	0.000687	-3.44
	IQCD	IQ motif containing D	6.97e-05	0.000688	2.17391
	OPA3	optic atrophy 3 (autosomal recessive, with chorea and spastic paraplegia)	6.99e-05	0.000689	3.57143
	OR6C76	olfactory receptor, family 6, subfamily C, member 76	6.98e-05	0.000689	-2.8
	GABBR1	gamma-aminobutyric acid (GABA) B receptor, 1	7.02e-05	0.000692	2.5
	CDH19	cadherin 19, type 2	7.02e-05	0.000692	-11.46
	DLL1	delta-like 1 (Drosophila)	7.04e-05	0.000693	5.88235
	COMP	cartilage oligomeric matrix protein	7.05e-05	0.000694	10.4167
	CKM	creatine kinase, muscle	7.06e-05	0.000694	10
	ARAP3	ArfGAP with RhoGAP domain, ankyrin repeat and PH domain 3	7.15e-05	0.000702	3.0303
	EFCAB4B	EF-hand calcium binding domain 4B	7.15e-05	0.000702	-3.25
	OLFML2A	olfactomedin-like 2A	7.16e-05	0.000703	2.5
	YBEY	ybeY metallopeptidase (putative)	7.19e-05	0.000705	-2.1
	SLC13A2	solute carrier family 13 (sodium-dependent dicarboxylate transporter), member 2	7.2e-05	0.000705	-4.42
	TLR1	toll-like receptor 1	7.19e-05	0.000705	-4.85
	PHF3	PHD finger protein 3	7.22e-05	0.000706	-2.51
	MLPH	melanophilin	7.23e-05	0.000707	-3.64
	C6orf27	chromosome 6 open reading frame 27	7.26e-05	0.000709	-2.13
	SPRY2	sprouty homolog 2 (Drosophila)	7.25e-05	0.000709	-3.11
	LINC00493	long intergenic non-protein coding RNA 493	7.32e-05	0.000714	-2.23
	C1orf140	uncharacterized LOC400804	7.32e-05	0.000714	-4.05
	LCE1E	late cornified envelope 1E	7.38e-05	0.00072	-2.6
	LY6E	lymphocyte antigen 6 complex, locus E	7.39e-05	0.000721	3.7037
	HSD17B14	hydroxysteroid (17-beta) dehydrogenase 14	7.41e-05	0.000722	-3.37
	MTHFS	5,10-methenyltetrahydrofolate synthetase (5-formyltetrahydrofolate cyclo-ligase)	7.43e-05	0.000723	-2.11
	ALDH1L2	aldehyde dehydrogenase 1 family, member L2	7.47e-05	0.000727	-4.61
	PTPN1	protein tyrosine phosphatase, non-receptor type 1	7.52e-05	0.000731	2.17391
	FOPNL	FGFR1OP N-terminal like	7.54e-05	0.000732	-2
	MYOD1	myogenic differentiation 1	7.56e-05	0.000733	3.44828
	LOC100133857	uncharacterized LOC100133857	7.55e-05	0.000733	-2.89
	HOPX	HOP homeobox	7.56e-05	0.000733	-3.57
	GPD1L	glycerol-3-phosphate dehydrogenase 1-like	7.57e-05	0.000734	-2.42
	PITPNM1	phosphatidylinositol transfer protein, membrane-associated 1	7.59e-05	0.000735	3.0303
	LOC285095	uncharacterized LOC285095	7.61e-05	0.000737	-2.54
	COX10	COX10 homolog, cytochrome c oxidase assembly protein, heme A: farnesyltransferase (yeast)	7.63e-05	0.000738	3.33333
	TRIM16L	tripartite motif containing 16-like	7.63e-05	0.000738	3.22581
	SCGB1A1	secretoglobin, family 1A, member 1 (uteroglobin)	7.67e-05	0.000742	-2.7
	APLP2	amyloid beta (A4) precursor-like protein 2	7.69e-05	0.000743	2.32558
	RAP2C	RAP2C, member of RAS oncogene family	7.7e-05	0.000744	2.63158
	TMSB10	thymosin beta 10	7.73e-05	0.000746	2.32558
	FANCA	Fanconi anemia, complementation group A	7.75e-05	0.000747	3.44828
	CSGALNACT2	chondroitin sulfate N-acetylgalactosaminyltransferase 2	7.75e-05	0.000747	2.12766
	LOC729706	putative TAF11-like protein ENSP00000332601-like	7.78e-05	0.000749	-2.09
	SOX11	SRY (sex determining region Y)-box 11	7.8e-05	0.000751	5.26316
	AMPD3	adenosine monophosphate deaminase 3	7.82e-05	0.000752	2.17391
	SCARNA16	small Cajal body-specific RNA 16	7.81e-05	0.000752	-4.09
	C9orf103	chromosome 9 open reading frame 103	7.83e-05	0.000753	-2.61
	CITED2	Cbp/p300-interacting transactivator, with Glu/Asp-rich carboxy-terminal domain, 2	7.85e-05	0.000754	-2.27
	SATB1	SATB homeobox 1	7.85e-05	0.000754	-2.6
	ZDHHC13	zinc finger, DHHC-type containing 13	7.88e-05	0.000757	2.43902
	KCTD17	potassium channel tetramerisation domain containing 17	7.98e-05	0.000766	-4.02
[truncated: 1,165 more rows]
